# Supplementary material for: Comprehensive genomic analysis of the CNGC gene family in Brassica oleracea: novel insights into synteny, structures, and transcript profiles
Source: PubMed Central journal article supplement (PMC5683364; doi:10.1186/s12864-017-4244-y), 2017-11-13
Supplement: 12864_2017_4244_MOESM2_ESM.pdf [file 12864_2017_4244_MOESM2_ESM.pdf]

Bra022702 : -----\*-----20-----\*-----40-----\*-----60-----\*-----80-----\*-----100-----\*-----  
BoCNGC15 : -----MATEQEFTR-----ASRVSGA-----SSSVG-----YYSDEDEYKDEEE-----EEEEEEEEEMEETEKD-----  
AtCNGC4 : -----MATEQEFTR-----ASRVSGA-----SSSVG-----CYSDDEDYKDEEE-----EEEEEEEEEMEETEKD-----  
Bra003001 : -----MATEQEFTR-----ASRVSRD-----SSSVG-----YSEEDNTEEED-----EEEEEMEEIEEEEE-----  
BoCNGC16 : -----MATEQEFTR-----ASRVSRA-----SSSIG-----YSDDYTTDEE-----ENEEEMEELE-EAE-----  
Bra008699 : -----MATEQEFTR-----ASRVSRA-----SSSIG-----YYSDEDEYTTTEE-----EDEEEEMEEQE-EEE-----  
BoCNGC17 : -----MPSHTNLFWRWIGLFSQKLRRETTEISEN-----NGGESSSSS-----DDTPVLSSGECYACTQVGFPAFHSTSCDQANAPEWR-----  
AtCNGC2 : -----MPSHTNLFWRWIGLFSQKLRRETTEISEN-----NVGESSSSS-----DDTPVLSSGECYACTQVGFPAFHSTSCDQANAPEWR-----  
Bra004537 : -----MEMMNLKRNTEFVKFTEN-----EDSWN-----RPSVTSVIKKTVRRSFEKGSSEKIRTFKQQ-----  
BoCNGC2 : -----MEMMNLKRNTEFVKFTEN-----EDSWN-----RPSVTSVIKKTVRRSFEKGSSEKIRTFKQQ-----  
AtCNGC3 : -----MMNPQRNKFVRFNGN-----DDEFSTKTRPSVSSVMK-----TVRRSFEKGSSEKIRTFKQR-----  
Bra000937 : -----MGFGRDSRVR-FKEPSS-T-----EFGYGR-RARPSLNAVLD-NVRRGFEKGSSEKIRTFKQR-----  
BoCNGC1 : -----MGFGRDNRRVRFKPESS-T-----EYGYGR-RARPSLNAVLD-NVRRGFEKGSSEKIRTFKQR-----  
AtCNGC13 : -----MAFGRNRRVRFWDWISSEGT-----EYGYGRNRRVRFWDWISSEGT-----LKK-----  
AtCNGC10 : -----MILFRFKDEG-KPLSS-----EYGYGR-KARPSLDRVFK-NVRRG-----LKK-----  
Bra034281 : -----MERASTIQSV-----HENIK-----SVRGQLKVVYK-----TLKTLNWRK-----  
BoCNGC3 : -----MERASTMQSV-----HENIK-----SVRGQLKVVYK-----TLNLTENWRK-----  
AtCNGC11 : -----MNLQRRKFVRLDSTG-V-----DGKLL-----SVRGRLKVVYK-----KMKTLNWRK-----  
AtCNGC12 : -----MNHRRSKFARIDSMG-V-----DGKLL-----SVRGRLKVVYK-----KMKTLNWRK-----  
Bra003323 : -----MTIFSVQSTLFRASVALLS-----SNGLKRFSFASFSAAAL-----YSPPLPKTKKR-----  
Bra031515 : -----MTIFSVQSTLFRASVALLS-----SNGLKRFSFASFSAAAL-----YSPPLPKTKKR-----  
Bra022632 : -----MNFRQEKVRFQDWKSDKTS-DVEYSGRNEPNGIFRRTIISISD-KFHR-----SSARIKTFRRTYK-----  
AtCNGC1 : -----MNFRQEKVRFQDWKSDKTS-DVEYSGRNEPNGIFRRTIISISD-KFHR-----SSARIKTFRRTYK-----  
Bra003081 : MKFRLTSLTLSSCGSRVLHSSHKEGYTTISCASNPTMFRPDKSVRFHDWKSDDKAS-DVEYS-----EVPDGLYRRAISSISD-KFHR-----SSLRIKMLR-----T-----  
Bra020402 : -----MTFASLPHYHFCRASDRGLSRSSVIELAIMAGKPKQTFVSVDDLDLDFKLPSS-SSLTRQHNYSSSIS-GPLHPIQ-----GSHNTSGSFKKRFQ-----  
BoCNGC7 : -----MAGKPKQTFVSVDDLDLDFKLPSS-SSLTRQHNYSSSIS-GPLHPIQ-----GSHNTSGSFKKRFQ-----  
AtCNGC5 : -----MAGKRENFVRVDDLDLDFKLPSS-S-VAFQKQNYASNFS-GQLHPIH-----ASNETSRSFKKGIQ-----  
Bra024067 : -----MDSRYSQ-----GAEAGLNKCTLNLIQ-GPSRANG-AGQGNNNNASSSGSFKKGFR-----  
BoCNGC6 : -----MFDVCVKSQVVISGQREKFRVRLDSMDSRYSQ-GSEAGLSKCTLNLIQ-GQSRANGGTGQGNNNNASSSGSFKKGFR-----  
AtCNGC9 : -----MLDCGKAVKSQVVISGRLEKFRVRLDSMDSRYSQ-TSDTGLNRCCTLNLIQ-GPTRGGG-AQGN--VSSGSFKKGFR-----  
Bra039221 : -----MESKSQVVISGHRKFIKRLDSMDPR-----SPEAGLNCTINIQ-RPKRFTQ-----ANKTSSGSFKKGFR-----  
BoCNGC4 : -----MESKSQVVISGHRKFIKRLDSMDPR-----SPEAGLNCTINIQ-RPKRFTQ-----ANKTSSGSFKKGFR-----  
Bra032132 : -----MFD-CGTNGVKSQVVISGHRKFIKRLDSMDSRYSQ-SDNTGLNCTLNLIQ-APKRFAQ-----GSKTSSGSFKKGFR-----  
BoCNGC5 : -----MFD-CGTNGVKSQVVISGHRKFIKRLDSMDSRYSQ-SDNTGLNCTLNLIQ-APKRFAQ-----GSKTSSGSFKNKFR-----  
AtCNGC6 : -----MFDTCGPKGVKSQVVISGQRENFRVRLDSMDSRYSQ-SE-TGLNCTLNLIQGGPKRFAQ-----GSKASSGSFKKGFR-----  
Bra026086 : -----MMTKRNCFG-FPVKNRGS-----EKRR-ASKSFREGVK-----  
BoCNGC8 : -----MYKSQYISGQREKFRVRLDDLDSSASHA-T-GMMTKRNCFG-FPVKNRGS-----EKRR-ASKSFREGVK-----  
AtCNGC7 : -----MMTKRNCFG-FNLKNRGG-----EKRR-ASKSFREGVK-----  
AtCNGC8 : -----MYKSQYISGHRKFIKRLDSDSRVMS-SNATGMKRRSFCGLFNVTSRGG-----GKTKNTSKSFREGVK-----  
Bra008733 : -----MNIKIRSLRFLPETITSA-----MNIKIRSLRFLPETITSA-----  
BoCNGC13 : -----MNIKIRSLRFLPETITSA-----MNIKIRSLRFLPETITSA-----  
AtCNGC18 : -----MNIKIRSLRFLPETITSA-----MNIKIRSLRFLPETITSA-----  
Bra018089 : -----MSNLHLHTSARFRNFPTAFSRR-----MSNLHLHTSARFRNFPTAFSRR-----  
BoCNGC14 : -----MSNLHLHTSARFRNFPTAFSRR-----MSNLHLHTSARFRNFPTAFSRR-----  
AtCNGC16 : -----MSNLHLHTSARFRNFPTAFSRR-----MSNLHLHTSARFRNFPTAFSRR-----  
Bra011186 : -----MELRKDKILMLYSDKK-EPKEAIWAVNDPMSKSYKLSLPSALKPPDNNL-----  
BoCNGC10 : -----MELSKDKILMLYSDKK-EPKEAIWAVNDPMSKSYKLSLPSALKPPDNL-----  
AtCNGC17 : -----MELRKDKILMLFYSEGK-ESKEAKWAVNDPMSKSYKLSLPSALRP-DNL-----  
Bra007839 : -----MEFKRDNTVRFYGEKQTELEATEKRQPLPMLKPTSTQFLKPELVI PKKTNK-----  
BoCNGC12 : -----MEFKRDNTVRFYGEKQTELEATEKRQPLPMLKPTSTQFLKPELVI PKKTNK-----  
Bra032081 : -----MEFKRDNTVRFYGEKQTELEATEKRQPLPMLKPTSTQFLKPELVI PKKTNK-----  
BoCNGC11 : -----MEFKRDNTVRFYGEKQTELEATEKRQPLPMLKPTSTQFLKPELVI PKKTNK-----  
AtCNGC14 : -----MEFKRDNTVRFYGEKQTELEATEKRQPLPMLKPTSTQFLKPELVI PKKTNK-----  
Bra011963 : -----MGYGNRSRVRFEEDSEVTKPQAVHEETAELKFKINGAQISPRKNVKKMT-----  
BoCNGC9 : -----MGYGNRSRVRFEEDSEVTKPQAVHEETAELKFKINGAQISPRKNVKKMT-----  
AtCNGC15 : -----MGYGNRSRVRFEEDSEVTKPQAVHEETAELKFKINGAQISPRKNVKKMT-----  
Bra021266 : -----MASPKE-NDDVPMLPISDTS-RTRPFTSRSRVSLNCTSTIDGF-DSSTVVLYGTGFLRAQRRPP-LVQMSGPLSS-TRTPEPLFLLPPP-----DSVGIS-----  
BoCNGC21 : -----MASPKE-NDDVPMLPISDTS-RTRPFTSRSRVSLNCTSTIDGF-DSSTVVLYGTGFLRAQRRPP-LVQMSGPLSS-TRNPEPLFLLPPP-----DSVGIS-----  
BoCNGC20 : -----ME-KDDVPMLPVSDDSSLS-RTRPFTSRSRVSLANTSSIDGF-DSSTVVLYGTGFLRTRRRPP-LVQMSGPLSS-TRSEPEPLFLLPPP-----STRDVS-----  
AtCNGC20 : -----MASHNE-NDDIPMLPISDPSSRT-RARAFTSRSRVSLNCTSTIEGF-DTSTVVLYGTGFLRTRRRPP-LVQMSGPLSS-TRKHEPLFLLPPP-----DSVGIS-----  
BoCNGC22 : -----MAPPNE-KDDVPMLPISDSSSSS-RTRPFTSRSRVSLANTSSAIDGF-DSSTVVLYGTGFLQTYGRPA-FVQMSALPS-TLPEPLFLLHPTPTGSSSHSIVS-----  
Bra029958 : -----MLPISDASSSSSQRVFTSRTRVSLNCTSTIEGF-NSKAATLGYAGSLPSQ-RPP-LFPMTGPLSSSTR-----  
BoCNGC23 : -----MVSPNK-NDKIHILPISDASSSSSQRVFTSRTRVSLNCTSTIEGF-NSNAVTLGYAGSLPSQ-RPP-LVPMTGPLSSSTRRPEPLFPPAPP-----  
Bra021265 : -----NDQVSIPEATSRATRAFNKRSVSLNCTSTIEGF-DNSKVALGYTVPIRTQRRPP-----GLYS-TRP-ESHFPPS-----I-----  
BoCNGC24 : -----MISPNE-NDQVSIPEATSRATRAFNKRSVSLNCTSTIEGF-DNSKVALGYTVPIRTQRRPP-----GLYS-TRP-ESHFPPS-----I-----  
AtCNGC19 : -----MAHTRTFTSRNRVSLNCTSTIEGF-DNSTVTLGYTGFLRTRRRPP-LVQMSGPLSS-TRTPEPLFLLPPP-----DSVGIS-----  
Bra022232 : -----MASPNE-KDEFPILLPVPEARSANTRAFNRNRVSLNCTSTIEGF-DNSTVTLGYTGFLRTRRRPP-LVQMSGPLSS-TRTPEPLFLLPPP-----DSVGIS-----  
BoCNGC25 : -----MASPNE-KDEFPILLPVSEARPRANTRAFNRNRVSLNCTSTIEGF-DNSTVTLGYTGFLRTRRRPP-LVQMSGPLSS-TRTPEPLFLLPPP-----DSVGIS-----  
Bra022233 : -----MASPNE-NDEFPMLRQVPEARS-RALHSRNRVSLNCTSTIEGF-DNSTVTLGYTGFLRTRRRPP-LVQMSGPLSS-TRTPEPLFLLPPP-----DSVGIS-----  
BoCNGC26 : -----MAYPNE-SDEFPMLRQVPEARSRAQSRALHSRNRVSLNCTSTIEGF-DNSTVTLGYTGFLRTRRRPP-LVQMSGPLSS-TRTPEPLFLLPPP-----DSVGIS-----  
Bra001676 : -----MASPME-NDDVPMLPASDTS-RTMPFTSRSRVSLNCTSTIEGF-DNSTVTLGYTGFLRTRRRPP-LVQMSGPLSS-TRTPEPLFLLPPP-----DSVGIS-----  
BoCNGC18 : -----MASPME-NDDVPMLPASDTS-RTMPFTSRSRVSLNCTSTIEGF-DNSTVTLGYTGFLRTRRRPP-LVQMSGPLSS-TRTPEPLFLLPPP-----DSVGIS-----  
Bra001678 : -----MASSNG-YDDVPMLPASDTS-RTMPFTSRSRVSLNCTSTIEGF-DNSTVTLGYTGFLRTRRRPP-LVQMSGPLSS-TRTPEPLFLLPPP-----DSVGIS-----  
Bra022702 : -----120-----\*-----140-----\*-----160-----\*-----180-----\*-----200-----\*-----220-----\*-----  
BoCNGC15 : -----EEEEPRVVRTCGGRR-NGSPGSYNKWMMLGRITDDE-----  
AtCNGC4 : -----EEEEPRVVRTCGGRR-NGSPGSYNKWMMLGRITDDE-----  
Bra003001 : -----EEEEPRVVRTCGGRR-NGSPGSYNKWMMLGRITDDE-----  
BoCNGC16 : -----EEEEPRVVRTCGGRR-NGSPGSYNKWMMLGRITDDE-----  
Bra008699 : -----ASAGSSLVPIQEGSAPDPVRRARIRRLKGFPGFVLDDE-----  
BoCNGC17 : -----ASAGSSLVPIQEGSAPDPVRRARIRRLKGFPGFVLDDE-----  
AtCNGC2 : -----ASAGSSLVPIQEGSAPDPVRRARIRRLKGFPGFVLDDE-----  
Bra004537 : -----ASAGSSLVPIQEGSAPDPVRRARIRRLKGFPGFVLDDE-----  
BoCNGC2 : -----PLTFHSQKKNEN-KKKIIR-VMNEN-----  
AtCNGC3 : -----PLTFHSQKKNEN-KKKIIR-VMNEN-----  
Bra000937 : -----PLSVHSHKNEEKRNATGTQKKNINBQ-----  
BoCNGC1 : -----PLSVHSHKNEEKRNATGTQKKNINBQ-----  
AtCNGC13 : -----PLSVHSHKNEEKRNATGTQKKNINBQ-----  
AtCNGC10 : -----PLSVHSHKNEEKRNATGTQKKNINBQ-----  
Bra034281 : -----AILLVCVVALG-----  
BoCNGC3 : -----AILLVCVVALG-----  
AtCNGC11 : -----TVLLACVVALA-----  
AtCNGC12 : -----TVLLACVVALA-----  
Bra003323 : -----RFPIVSAVDIGGVTVARNDDDPTNIVP-----  
Bra031515 : -----IVLLVCLVALA-----  
Bra022632 : -----SYSFKEAVSKGIDSSHKILD-----EQ-----  
AtCNGC1 : -----SYSFKEAVSKGIDSSHKILD-----EQ-----  
Bra003081 : -----SYSFKEAVSKGIDSSHKILD-----EQ-----  
Bra020402 : -----KGSKGLKSIGRSLGFGYRAVFPEDLVSEKKIDDE-----  
BoCNGC7 : -----KGSKGLKSIGRSLGFGYRAVFPEDLVSEKKIDDE-----  
BoCNGC4 : -----KGSEGLWSIGRSLGFGYRAVFPEDLVSEKKIDDE-----  
Bra032132 : -----KGSEGLWSIGRSLGFGYRAVFPEDLVSEKKIDDE-----  
BoCNGC5 : -----KGSEGLWSIGRSLGFGYRAVFPEDLVSEKKIDDE-----  
AtCNGC6 : -----KGSEGLWSIGRSLGFGYRAVFPEDLVSEKKIDDE-----  
Bra026086 : -----IGSEGLFSIGKS-VTRAVFPEDLRSEKKIDDE-----  
BoCNGC8 : -----IGSEGLFSIGKS-VTRAVFPEDLRSEKKIDDE-----  
AtCNGC7 : -----IRSEGLITIGKS-VTRAVFPEDLRSEKKIDDE-----  
AtCNGC8 : -----IGSEGLTIGKSFTSGVTRAVFPEDLRSEKKIDDE-----  
Bra008733 : -----ASNRGSVAVRYGSQVLPWRHQIDDE-----  
BoCNGC13 : -----ASNRGSVAVRYGSQVLPWRHQIDDE-----  
AtCNGC18 : -----AASNRGSDGSQFS-VLWRHQIDDE-----  
Bra018089 : -----HHNNNDLQNRGRSVFSELGDTTIDDE-----  
BoCNGC14 : -----HHNNNDLQNRGRSVFSELGDTTIDDE-----  
AtCNGC16 : -----HHNNNDLQNRGRSVFSELGDTTIDDE-----  
Bra011186 : -----LSGNRISRYTDNNKSKSKSPSWYKTIDDE-----  
BoCNGC10 : -----LAGNRISRYTDNNKSKSKSPSWYKTIDDE-----  
AtCNGC17 : -----LPGNRL-RYTDASKSKSKSPSWYKTIDDE-----  
Bra007839 : -----TRLFKLPREFGGLKVPENFEIERDKIDDE-----  
BoCNGC12 : -----TRLFKLPREFGGLKVPENFEIERDKIDDE-----  
Bra032081 : -----IFKIPREFGGLKVPENFEIERDKIDDE-----  
BoCNGC11 : -----IFKIPREFGGLKVPENFEIERDKIDDE-----  
AtCNGC14 : -----TRLFKLPREFGGLKVPENFEIERDKIDDE-----  
Bra011963 : -----RGKSFKDKVLSRVFTEDLGRVKNKIDDE-----  
BoCNGC9 : -----RGKSFKDKVLSRVFTEDLGRVKNKIDDE-----  
AtCNGC15 : -----KGKFLKAVLSRVFTEDLGRVKNKIDDE-----  
Bra021266 : SSQPERYPSFATLEHKKS-DEEFLKHAHL-----LRSGQLGMCNDPYCTTCPSYNRKAAQIPSSRVSAFFDS-----KFHNALYDDAGWARRFATTANRYLPGIMNEH-----  
BoCNGC21 : SSQPERYPSFATLEHKKS-DEEFLKHAHL-----LRSGQLGMCNDPYCTTCPSYNRKAAQIPSSRVSAFFDS-----KFHNALYDDAGWARRFATTANRYLPGIMNEH-----  
BoCNGC20 : SSQPERYPSFATLEHKKS-DEEFLKHAHL-----LRSGQLGMCNDPYCTTCPSYNRKAAQIPSSRVSAFFDS-----TFH-----DARGWARRFATINRHLPGIMNEH-----  
AtCNGC20 : S-QPERYPSFAALEHKNSSEDEFLKHAHL-----LRSGQLGMCNDPYCTTCPSYNRKAAQIPSSRVSAFFDS-----TFH-----DARGWARRFATINRHLPGIMNEH-----  
BoCNGC22 : SSQPESCP-FAALEHKNS-DEEFLGLG-----SGLEVCNDPYCTTCPSYNRKAAQIPSSRVSAFFDS-----KLHAMCDDARGWARRFATINRHLPGIMNEH-----  
Bra029958 : -----SSGYFDLEEVNSSDNDLKHAAH-----LRSGQLGMCNDPYCTTCPSYNRKAAQIPSSRVSAFFDS-----TFH-----DARGWARRFATINRHLPGIMNEH-----  
BoCNGC23 : -----PTRSSGYFDLEEVNSSDNDLKHAAH-----LRSGQLGMCNDPYCTTCPSYNRKAAQIPSSRVSAFFDS-----TFH-----DARGWARRFATINRHLPGIMNEH-----  
Bra021265 : EPPDS-SS-TVDVRSSEDE-SVLENANI-----LRSGQLGMCNDPYCTTCPSYNRKAAQIPSSRVSAFFDS-----FHTVLYDDARGWARRFATINRHLPGIMNEH-----



120 \* 140 \* 160 \* 180 \* 200 \* 220 \*
BoCNGC24 : EPPDS---SS-TVDVRSDE--SVVKNANI-----LTSGQLGMCNEPYCTTCSYYSHQANFHTS-KVSDSR-----FHTALYDDARGWAKRFASSVRRCPVGMNPH
AtcNGC19 : ESPDS---SS-TVDVPPEDD--FVFKNANL-----LRSGQLGMCNDPYCTTCSYYSNRQAAQLHTS-RVSASR-----FRTLVLGDARGWAKRFASSVRRCLPGIMNPH
Bra022232 : QPPDS---SS-TVDVPSDED--EVVLKNANL-----LKSQQLGMCNDPYCTTCSYYSNRQAAQFHTYRVSVDSSR-----FRTALYDDARGWAKRFASSVRRKMVPGIMNPH
BoCNGC25 : QPPDSSLSSS-TVDVPSDED--EVVLKNANL-----LKSQQLGMCNDPYCTTCSYYSNRQAAQFHTYRVSVDSSR-----FRTALYDDARGWAKRFASSVRRKLPIMNPH
Bra022233 : QPPASSLSSS-TVDIPSEEVVEALLKNANL-----LKSQQLGMCNDPYCTTCSYYSNRQAAQFHTYGVVSDSRTQVNVTHNRQALHDYDRGWAKLFASVYRRCVPGIINPH
BoCNGC26 : QPPASSLSSSTVDIPSEEVVEALLKNANL-----LKSQQLGMCNDPYCTTCSYYSNRQAAQFHTYGVVSDSRTQVNVTHNRQALHDYDRGWAKLFASVYRRCVPGIINPH
Bra001676 : STGASYSVSGASSQPNERNHAYS-----RTPRVFATSDF-----TLHNALDDDAKAWA-----KYFSGIIYPE
BoCNGC18 : STGASDSVSGASSQPNERNHAYS-----RTPRVFATSDF-----TLHNALDDDAKAWA-----KYFSGIIYPE
Bra001678 : -----
BoCNGC19 : GTTCCPSDYNREAAQIPTPR-----VSDS-----MVHNARDDDAKAWARFATSVDKYLPKIMEBN
Bra031529 : STGGSSDPVGVSSSQPERYPSFAALEHDNSDDNSVLNPHLLRSEKFGVCNDPYCTTCSYYSNRKADQVPTSRVPAIFYS-----MFHSALYEDAKARARFATSVDNHLPGIMNPH

240 \* 260 \* 280 \* 300 \* 320 \* 340
Bra022702 : SKLVQEWNRVFLVLCATGFLVDPLFLYTLISNDAC---MCLIVDGMALTVTALRSMTDLHLHWNLIQFKIARRWYPGGDSDGDKNGDCTRVRT--RVAAPPYVKKNG-FFFDI
AtcNGC15 : SKLVQEWNRVFLVLCATGFLVDPLFLYTLISNDAC---MCLIVDGMALTVTALRSMTDLHLHWNLIQFKIARRWYPGGDSDGDKNGDCTRVRT--RVAAPPYVKKNG-FFFDI
BoCNGC4 : SKLVQEWNRVFLVLCATGFLVDPLFLYTLISNDTC---MCLIVDGMALTVTALRSMTDLHLHWNLIQFKIARRWYPGGDSDGDKNGDCTRVRT--RVAAPPYVKKNG-FFFDI
Bra003001 : SKLVQEWNRVFLVLCATGFLVDPLFLYTLISNDAC---MCLIVDGMALTVTALRSMTDLHLHWNLIQFKIARRWYPGGDSDGDKNGDCTRVRT--RVAAPPYVKKNG-FFFDI
BoCNGC16 : SKLVQEWNRVFLVLCATGFLVDPLFLYTLISNDAC---MCLIVDGMALTVTALRSMTDLHLHWNLIQFKIARRWYPGGDSDGDKNGDCTRVRT--RVAAPPYVKKNG-FFFDI
Bra008699 : SKRVRQWNRALLLARGMALAVDPLFFYALSIGRTTG-PACLYMDGAFAAVTVVRICLDAHLHWHVWLQFRLA---YVSRES---LVVCCCKLVWDDPRATASHYARSLTGFWFDV
BoCNGC17 : SKRVRQWNRALLLARGMALAVDPLFFYALSIGRTTG-PACLYMDGAFAAVTVVRICLDAHLHWHVWLQFRLA---YVSRES---LVVCCCKLVWDDPRATASHYARSLTGFWFDV
AtcNGC2 : SKRVRQWNRALLLARGMALAVDPLFFYALSIGRTTG-PACLYMDGAFAAVTVVRICLDAHLHWHVWLQFRLA---YVSRES---LVVCCCKLVWDDPRATASHYARSLTGFWFDV
Bra004537 : DSYLQWNRKIFLLLCVVALADPLFFYIPVDPG---RRCIKLDRKLEAVACVFRFIDAFYVHIFHFQFRTG---FIAPSS---RGFGRGELVQSSKLAIRYLL--KSYFIIDV
BoCNGC2 : DSYLQWNRKIFLLLCVVALADPLFFYIPVDPG---RRCIKLDRKLEAVACVFRFIDAFYVHIFHFQFRTG---FIAPSS---RGFGRGELVQSSKLAIRYLL--KSYFIIDV
AtcNGC3 : DSYLQWNRKIFLLLCVVALADPLFFYIPVDPG---RRCIKLDRKLEAVACVFRFIDAFYVHIFHFQFRTG---FIAPSS---RGFGRGELVQSSKLAIRYLL--KSYFIIDV
Bra000937 : GSFQWNRKIFLLFASVIALADPLFFYIPVDPG---RRCIKLDRKLEAVACVFRFIDAFYVHIFHFQFRTG---FIAPSS---RGFGRGELVQSSKLAIRYLL--KSYFIIDV
BoCNGC1 : GSFQWNRKIFLLFASVIALADPLFFYIPVDPG---RRCIKLDRKLEAVACVFRFIDAFYVHIFHFQFRTG---FIAPSS---RGFGRGELVQSSKLAIRYLL--KSYFIIDV
AtcNGC13 : GSFQWNRKIFLLFASVIALADPLFFYIPVDPG---RRCIKLDRKLEAVACVFRFIDAFYVHIFHFQFRTG---FIAPSS---RGFGRGELVQSSKLAIRYLL--KSYFIIDV
BoCNGC10 : DSYLQWNRKIFLLFACVVALADPLFFYIPVDPG---RRCIKLDRKLEAVACVFRFIDAFYVHIFHFQFRTG---FIAPSS---RGFGRGELVQSSKLAIRYLL--KSYFIIDV
Bra034281 : VDFLFLFIPVDSF---NCFDFTDKKAAVVAARFIDTFYVHIFHFQFRTG---FIAPSS---QVSLRGLVHSHKATKRLKLF--FFHFIVDI
BoCNGC3 : VDFLFLFIPVDSF---NCFDFTDKKAAVVAARFIDTFYVHIFHFQFRTG---FIAPSS---QVSLRGLVHSHKATKRLKLF--FFHFIVDI
AtcNGC11 : VDFLFLFIPVDSF---NCFDFTDKKAAVVAARFIDTFYVHIFHFQFRTG---FIAPSS---QVSLRGLVHSHKATKRLKLF--FFHFIVDI
BoCNGC12 : VDFLFLFIPVDSF---NCFDFTDKKAAVVAARFIDTFYVHIFHFQFRTG---FIAPSS---QVSLRGLVHSHKATKRLKLF--FFHFIVDI
Bra003323 : DSIFESN---YANCYHQATVDFLFFYIPVDSH---RRCIKLDRKLEAVACVFRFIDAFYVHIFHFQFRTG---FIAPSS---QVSLRGLVHSHKATKRLKLF--FFHFIVDI
Bra031515 : VDFLFLFIPVDSH---RRCIKLDRKLEAVACVFRFIDAFYVHIFHFQFRTG---FIAPSS---QVSLRGLVHSHKATKRLKLF--FFHFIVDI
Bra022632 : GPELQWNRKIFVLACIIAVSDPLFFYIPVDDA---KRCIGIDRKAIVATTTTRVIDDFYLFHMLALFRFTA---YVAPSS---RVFGRGELVIDPAKIAKRYLL--QYFIVDF
AtcNGC1 : GPELQWNRKIFVLACIIAVSDPLFFYIPVDDA---KRCIGIDRKAIVATTTTRVIDDFYLFHMLALFRFTA---YVAPSS---RVFGRGELVIDPAKIAKRYLL--QYFIVDF
Bra003081 : GPELQWNRKIFVLACIIAVSDPLFFYIPVDDA---KRCIGIDRKAIVATTTTRVIDDFYLFHMLALFRFTA---YVAPSS---RVFGRGELVIDPAKIAKRYLL--QYFIVDF
Bra020402 : DKTLLFCNKLFVASCIIAVSDPLFFYIPVDDA---KRCIGIDRKAIVATTTTRVIDDFYLFHMLALFRFTA---YVAPSS---RVFGRGELVIDPAKIAKRYLL--QYFIVDF
BoCNGC7 : DKTLLFCNKLFVASCIIAVSDPLFFYIPVDDA---KRCIGIDRKAIVATTTTRVIDDFYLFHMLALFRFTA---YVAPSS---RVFGRGELVIDPAKIAKRYLL--QYFIVDF
AtcNGC5 : DKTLLFCNKLFVASCIIAVSDPLFFYIPVDDA---KRCIGIDRKAIVATTTTRVIDDFYLFHMLALFRFTA---YVAPSS---RVFGRGELVIDPAKIAKRYLL--QYFIVDF
Bra024067 : DKTLLFCNKLFVASCIIAVSDPLFFYIPVDDA---KRCIGIDRKAIVATTTTRVIDDFYLFHMLALFRFTA---YVAPSS---RVFGRGELVIDPAKIAKRYLL--QYFIVDF
BoCNGC6 : DKTLLFCNKLFVASCIIAVSDPLFFYIPVDDA---KRCIGIDRKAIVATTTTRVIDDFYLFHMLALFRFTA---YVAPSS---RVFGRGELVIDPAKIAKRYLL--QYFIVDF
AtcNGC9 : DKTLLFCNKLFVASCIIAVSDPLFFYIPVDDA---KRCIGIDRKAIVATTTTRVIDDFYLFHMLALFRFTA---YVAPSS---RVFGRGELVIDPAKIAKRYLL--QYFIVDF
Bra039221 : DKTLLFCNKLFVASCIIAVSDPLFFYIPVDDA---KRCIGIDRKAIVATTTTRVIDDFYLFHMLALFRFTA---YVAPSS---RVFGRGELVIDPAKIAKRYLL--QYFIVDF
BoCNGC4 : DKTLLFCNKLFVASCIIAVSDPLFFYIPVDDA---KRCIGIDRKAIVATTTTRVIDDFYLFHMLALFRFTA---YVAPSS---RVFGRGELVIDPAKIAKRYLL--QYFIVDF
Bra032132 : DKTLLFCNKLFVASCIIAVSDPLFFYIPVDDA---KRCIGIDRKAIVATTTTRVIDDFYLFHMLALFRFTA---YVAPSS---RVFGRGELVIDPAKIAKRYLL--QYFIVDF
BoCNGC5 : DKTLLFCNKLFVASCIIAVSDPLFFYIPVDDA---KRCIGIDRKAIVATTTTRVIDDFYLFHMLALFRFTA---YVAPSS---RVFGRGELVIDPAKIAKRYLL--QYFIVDF
AtcNGC6 : DKTLLFCNKLFVASCIIAVSDPLFFYIPVDDA---KRCIGIDRKAIVATTTTRVIDDFYLFHMLALFRFTA---YVAPSS---RVFGRGELVIDPAKIAKRYLL--QYFIVDF
Bra026086 : DKTLLFCNKLFVASCIIAVSDPLFFYIPVDDA---KRCIGIDRKAIVATTTTRVIDDFYLFHMLALFRFTA---YVAPSS---RVFGRGELVIDPAKIAKRYLL--QYFIVDF
BoCNGC8 : DKTLLFCNKLFVASCIIAVSDPLFFYIPVDDA---KRCIGIDRKAIVATTTTRVIDDFYLFHMLALFRFTA---YVAPSS---RVFGRGELVIDPAKIAKRYLL--QYFIVDF
AtcNGC7 : DKTLLFCNKLFVASCIIAVSDPLFFYIPVDDA---KRCIGIDRKAIVATTTTRVIDDFYLFHMLALFRFTA---YVAPSS---RVFGRGELVIDPAKIAKRYLL--QYFIVDF
Bra008733 : SNIVTYWNRHVFVLTSLALFDFEYFYAPYVGG---G-PACLSVDVCAATVTFRRVADLHLLHIFMKFRTA---FVARS---RVFGRGELVDRPREIAMKYLL--KSDFIVDV
BoCNGC13 : SNIVTYWNRHVFVLTSLALFDFEYFYAPYVGG---G-PACLSVDVCAATVTFRRVADLHLLHIFMKFRTA---FVARS---RVFGRGELVDRPREIAMKYLL--KSDFIVDV
AtcNGC18 : SNIVTYWNRHVFVLTSLALFDFEYFYAPYVGG---G-PACLSVDVCAATVTFRRVADLHLLHIFMKFRTA---FVARS---RVFGRGELVDRPREIAMKYLL--KSDFIVDV
Bra018089 : GDLTRWNHIFLITCLLALFDPLFFYIPVQA---G-TACMSIDIGFGLVTFRRVADLHLLHIFMKFRTA---FVARS---RVFGRGELVDRPREIAMKYLL--KSDFIVDV
BoCNGC14 : GDLTRWNHIFLITCLLALFDPLFFYIPVQA---G-TACMSIDIGFGLVTFRRVADLHLLHIFMKFRTA---FVARS---RVFGRGELVDRPREIAMKYLL--KSDFIVDV
AtcNGC16 : GDLTRWNHIFLITCLLALFDPLFFYIPVQA---G-TACMSIDIGFGLVTFRRVADLHLLHIFMKFRTA---FVARS---RVFGRGELVDRPREIAMKYLL--KSDFIVDV
Bra011186 : SEIVLKNWVFIISCMALFDPLFFYIPVPA---GGKND-YEAKTDTNRILVTFRRVADLHLLHIFMKFRTA---FVARS---RVFGRGELVDRPREIAMKYLL--KSDFIVDV
BoCNGC10 : SEIVLKNWVFIISCMALFDPLFFYIPVPA---GGKND-YEAKTDTNRILVTFRRVADLHLLHIFMKFRTA---FVARS---RVFGRGELVDRPREIAMKYLL--KSDFIVDV
AtcNGC17 : SEIVLKNWVFIISCMALFDPLFFYIPVPA---GGKND-YEAKTDTNRILVTFRRVADLHLLHIFMKFRTA---FVARS---RVFGRGELVDRPREIAMKYLL--KSDFIVDV
Bra007839 : GDVVLQWNRVFLFWCLVALYVDFLFFYIPVQA---G-TACMSIDIGFGLVTFRRVADLHLLHIFMKFRTA---FVARS---RVFGRGELVDRPREIAMKYLL--KSDFIVDV
BoCNGC12 : GDVVLQWNRVFLFWCLVALYVDFLFFYIPVQA---G-TACMSIDIGFGLVTFRRVADLHLLHIFMKFRTA---FVARS---RVFGRGELVDRPREIAMKYLL--KSDFIVDV
AtcNGC14 : GDVVLQWNRVFLFWCLVALYVDFLFFYIPVQA---G-TACMSIDIGFGLVTFRRVADLHLLHIFMKFRTA---FVARS---RVFGRGELVDRPREIAMKYLL--KSDFIVDV
Bra011963 : GQTRKWNKFLIACLVSLFDPLFFYIPVQR---K-EACITIGIRVAVVLTVIRSLADAFYIACVIRFRTA---YIAPSS---RVFGRGELVIDSRKIAKRYLL--NKSFWIHL
BoCNGC9 : GQTRKWNKFLIACLVSLFDPLFFYIPVQR---K-EACITIGIRVAVVLTVIRSLADAFYIACVIRFRTA---YIAPSS---RVFGRGELVIDSRKIAKRYLL--NKSFWIHL
AtcNGC15 : GQTRKWNKFLIACLVSLFDPLFFYIPVQR---K-EACITIGIRVAVVLTVIRSLADAFYIACVIRFRTA---YIAPSS---RVFGRGELVIDSRKIAKRYLL--NKSFWIHL
Bra021266 : SKFVQSWTKFFALSCLLAFIDPLFFYIPVQRNDK---CIVIDWPKAKAFVAVRSVTDVLEFSVNLQ---FRLAYVAPES---RVFGRGELVDRPREIAMKYLL--KSDFIVDV
BoCNGC21 : SKFVQSWTKFFALSCLLAFIDPLFFYIPVQRNDK---CIVIDWPKAKAFVAVRSVTDVLEFSVNLQ---FRLAYVAPES---RVFGRGELVDRPREIAMKYLL--KSDFIVDV
BoCNGC20 : SKFVQSWTKFFALSCLLAFIDPLFFYIPVQRNDK---CIVIDWPKAKAFVAVRSVTDVLEFSVNLQ---FRLAYVAPES---RVFGRGELVDRPREIAMKYLL--KSDFIVDV
AtcNGC20 : AKFVQSWTKFFALSCLLAFIDPLFFYIPVQRNDK---CIVIDWPKAKAFVAVRSVTDVLEFSVNLQ---FRLAYVAPES---RVFGRGELVDRPREIAMKYLL--KSDFIVDV
BoCNGC22 : YKFWQSWTKFFALSCLLAFIDPLFFYIPVQRNDK---CIVIDWPKAKAFVAVRSVTDVLEFSVNLQ---FRLAYVAPES---RVFGRGELVDRPREIAMKYLL--KSDFIVDV
Bra029958 : SKFVQSWTKFFALSCLLAFIDPLFFYIPVQRNDK---CIVIDWPKAKAFVAVRSVTDVLEFSVNLQ---FRLAYVAPES---RVFGRGELVDRPREIAMKYLL--KSDFIVDV
BoCNGC23 : SKFVQSWTKFFALSCLLAFIDPLFFYIPVQRNDK---CIVIDWPKAKAFVAVRSVTDVLEFSVNLQ---FRLAYVAPES---RVFGRGELVDRPREIAMKYLL--KSDFIVDV
AtcNGC12 : SKFVQSWTKFFALSCLLAFIDPLFFYIPVQRNDK---CIVIDWPKAKAFVAVRSVTDVLEFSVNLQ---FRLAYVAPES---RVFGRGELVDRPREIAMKYLL--KSDFIVDV
BoCNGC24 : SKFVQSWTKFFALSCLLAFIDPLFFYIPVQRNDK---CIVIDWPKAKAFVAVRSVTDVLEFSVNLQ---FRLAYVAPES---RVFGRGELVDRPREIAMKYLL--KSDFIVDV
AtcNGC19 : SKFVQSWTKFFALSCLLAFIDPLFFYIPVQRNDK---CIVIDWPKAKAFVAVRSVTDVLEFSVNLQ---FRLAYVAPES---RVFGRGELVDRPREIAMKYLL--KSDFIVDV
Bra022232 : SKFVQSWTKFFALSCLLAFIDPLFFYIPVQRNDK---CIVIDWPKAKAFVAVRSVTDVLEFSVNLQ---FRLAYVAPES---RVFGRGELVDRPREIAMKYLL--KSDFIVDV
BoCNGC25 : SKFVQSWTKFFALSCLLAFIDPLFFYIPVQRNDK---CIVIDWPKAKAFVAVRSVTDVLEFSVNLQ---FRLAYVAPES---RVFGRGELVDRPREIAMKYLL--KSDFIVDV
Bra022233 : SKFVQSWTKFFALSCLLAFIDPLFFYIPVQRNDK---CIVIDWPKAKAFVAVRSVTDVLEFSVNLQ---FRLAYVAPES---RVFGRGELVDRPREIAMKYLL--KSDFIVDV
BoCNGC26 : SKFVQSWTKFFALSCLLAFIDPLFFYIPVQRNDK---CIVIDWPKAKAFVAVRSVTDVLEFSVNLQ---FRLAYVAPES---RVFGRGELVDRPREIAMKYLL--KSDFIVDV
Bra001676 : SNVQLWTTTFVLSCLLAFIDPLFFYIPVQRNDK---CIVIDWPKAKAFVAVRSVTDVLEFSVNLQ---FRLAYVAPES---RVFGRGELVDRPREIAMKYLL--KSDFIVDV
BoCNGC18 : SNVQLWTTTFVLSCLLAFIDPLFFYIPVQRNDK---CIVIDWPKAKAFVAVRSVTDVLEFSVNLQ---FRLAYVAPES---RVFGRGELVDRPREIAMKYLL--KSDFIVDV
Bra001678 : SKFVQSWTKFFALSCLLAFIDPLFFYIPVQRNDK---CIVIDWPKAKAFVAVRSVTDVLEFSVNLQ---FRLAYVAPES---RVFGRGELVDRPREIAMKYLL--KSDFIVDV
BoCNGC19 : SKFVQSWTKFFALSCLLAFIDPLFFYIPVQRNDK---CIVIDWPKAKAFVAVRSVTDVLEFSVNLQ---FRLAYVAPES---RVFGRGELVDRPREIAMKYLL--KSDFIVDV
Bra031529 : SIFVQSWTKFFALSCLLAFIDPLFFYIPVQRNDK---CIVIDWPKAKAFVAVRSVTDVLEFSVNLQ---FRLAYVAPES---RVFGRGELVDRPREIAMKYLL--KSDFIVDV

360 \* 380 \* 400 \* 420 \* 440 \* 460
Bra022702 : FVILPLP---QVVLWVWVPSLLKRGSVTLVSVI---LLTFLFQYLPKIIYHSIRHLRQATLSGYIFGIVWGFALNMVAIFVAABAAGACWYL
BoCNGC15 : FVILPLP---QVVLWVWVPSLLKRGSVTLVSVI---LLTFLFQYLPKIIYHSIRHLRQATLSGYIFGIVWGFALNMVAIFVAABAAGACWYL
AtcNGC4 : FVILPLP---QVVLWVWVPSLLKRGSVTLVSVI---LLTFLFQYLPKIIYHSIRHLRQATLSGYIFGIVWGFALNMVAIFVAABAAGACWYL
Bra003001 : FVILPLP---QVVLWVWVPSLLKRGSVTLVSVI---LLTFLFQYLPKIIYHSIRHLRQATLSGYIFGIVWGFALNMVAIFVAABAAGACWYL
BoCNGC16 : FVILPLP---QVVLWVWVPSLLKRGSVTLVSVI---LLTFLFQYLPKIIYHSIRHLRQATLSGYIFGIVWGFALNMVAIFVAABAAGACWYL
Bra008699 : IVILPVP---QVVLWVWVPSLLKRGSVTLVSVI---LLTFLFQYLPKIIYHSIRHLRQATLSGYIFGIVWGFALNMVAIFVAABAAGACWYL
BoCNGC17 : IVILPVP---QVVLWVWVPSLLKRGSVTLVSVI---LLTFLFQYLPKIIYHSIRHLRQATLSGYIFGIVWGFALNMVAIFVAABAAGACWYL
AtcNGC2 : IVILPVP---QVVLWVWVPSLLKRGSVTLVSVI---LLTFLFQYLPKIIYHSIRHLRQATLSGYIFGIVWGFALNMVAIFVAABAAGACWYL
Bra004537 : LSVLPVP---QVVLWVWVPSLLKRGSVTLVSVI---LLTFLFQYLPKIIYHSIRHLRQATLSGYIFGIVWGFALNMVAIFVAABAAGACWYL
BoCNGC2 : LSVLPVP---QVVLWVWVPSLLKRGSVTLVSVI---LLTFLFQYLPKIIYHSIRHLRQATLSGYIFGIVWGFALNMVAIFVAABAAGACWYL
AtcNGC3 : LSVLPVP---QVVLWVWVPSLLKRGSVTLVSVI---LLTFLFQYLPKIIYHSIRHLRQATLSGYIFGIVWGFALNMVAIFVAABAAGACWYL
Bra000937 : LSVLPVP---QVVLWVWVPSLLKRGSVTLVSVI---LLTFLFQYLPKIIYHSIRHLRQATLSGYIFGIVWGFALNMVAIFVAABAAGACWYL
BoCNGC1 : LSVLPVP---QVVLWVWVPSLLKRGSVTLVSVI---LLTFLFQYLPKIIYHSIRHLRQATLSGYIFGIVWGFALNMVAIFVAABAAGACWYL
AtcNGC13 : LSVLPVP---QVVLWVWVPSLLKRGSVTLVSVI---LLTFLFQYLPKIIYHSIRHLRQATLSGYIFGIVWGFALNMVAIFVAABAAGACWYL
BoCNGC10 : LSVLPVP---QVVLWVWVPSLLKRGSVTLVSVI---LLTFLFQYLPKIIYHSIRHLRQATLSGYIFGIVWGFALNMVAIFVAABAAGACWYL
Bra034281 : CSVIPVP---QVVLWVWVPSLLKRGSVTLVSVI---LLTFLFQYLPKIIYHSIRHLRQATLSGYIFGIVWGFALNMVAIFVAABAAGACWYL
BoCNGC3 : CSVIPVP---QVVLWVWVPSLLKRGSVTLVSVI---LLTFLFQYLPKIIYHSIRHLRQATLSGYIFGIVWGFALNMVAIFVAABAAGACWYL
AtcNGC11 : ISVLPVP---QVVLWVWVPSLLKRGSVTLVSVI---LLTFLFQYLPKIIYHSIRHLRQATLSGYIFGIVWGFALNMVAIFVAABAAGACWYL
BoCNGC12 : ISVLPVP---QVVLWVWVPSLLKRGSVTLVSVI---LLTFLFQYLPKIIYHSIRHLRQATLSGYIFGIVWGFALNMVAIFVAABAAGACWYL
Bra003323 : VSVLPVP---QVVLWVWVPSLLKRGSVTLVSVI---LLTFLFQYLPKIIYHSIRHLRQATLSGYIFGIVWGFALNMVAIFVAABAAGACWYL
BoCNGC18 : VSVLPVP---QVVLWVWVPSLLKRGSVTLVSVI---LLTFLFQYLPKIIYHSIRHLRQATLSGYIFGIVWGFALNMVAIFVAABAAGACWYL
Bra022632 : LSVLPVP---QVVLWVWVPSLLKRGSVTLVSVI---LLTFLFQYLPKIIYHSIRHLRQATLSGYIFGIVWGFALNMVAIFVAABAAGACWYL
AtcNGC1 : LSVLPVP---QVVLWVWVPSLLKRGSVTLVSVI---LLTFLFQYLPKIIYHSIRHLRQATLSGYIFGIVWGFALNMVAIFVAABAAGACWYL
Bra003081 : LSVLPVP---QVVLWVWVPSLLKRGSVTLVSVI---LLTFLFQYLPKIIYHSIRHLRQATLSGYIFGIVWGFALNMVAIFVAABAAGACWYL
BoCNGC2 : LSVLPVP---QVVLWVWVPSLLKRGSVTLVSVI---LLTFLFQYLPKIIYHSIRHLRQATLSGYIFGIVWGFALNMVAIFVAABAAGACWYL
Bra020402 : LSVLPVP---QVVLWVWVPSLLKRGSVTLVSVI---LLTFLFQYLPKIIYHSIRHLRQATLSGYIFGIVWGFALNMVAIFVAABAAGACWYL
BoCNGC7 : LSVLPVP---QVVLWVWVPSLLKRGSVTLVSVI---LLTFLFQYLPKIIYHSIRHLRQATLSGYIFGIVWGFALNMVAIFVAABAAGACWYL
AtcNGC5 : LSVLPVP---QVVLWVWVPSLLKRGSVTLVSVI---LLTFLFQYLPKIIYHSIRHLRQATLSGYIFGIVWGFALNMVAIFVAABAAGACWYL
Bra024067 : LSVLPVP---QVVLWVWVPSLLKRGSVTLVSVI---LLTFLFQYLPKIIYHSIRHLRQATLSGYIFGIVWGFALNMVAIFVAABAAGACWYL
BoCNGC6 : LSVLPVP---QVVLWVWVPSLLKRGSVTLVSVI---LLTFLFQYLPKIIYHSIRHLRQATLSGYIFGIVWGFALNMVAIFVAABAAGACWYL
AtcNGC9 : LSVLPVP---QVVLWVWVPSLLKRGSVTLVSVI---LLTFLFQYLPKIIYHSIRHLRQATLSGYIFGIVWGFALNMVAIFVAABAAGACWYL
Bra039221 : LSVLPVP---QVVLWVWVPSLLKRGSVTLVSVI---LLTFLFQYLPKIIYHSIRHLRQATLSGYIFGIVWGFALNMVAIFVAABAAGACWYL
BoCNGC4 : LSVLPVP---QVVLWVWVPSLLKRGSVTLVSVI---LLTFLFQYLPKIIYHSIRHLRQATLSGYIFGIVWGFALNMVAIFVAABAAGACWYL
Bra032132 : LSVLPVP---QVVLWVWVPSLLKRGSVTLVSVI---LLTFLFQYLPKIIYHSIRHLRQATLSGYIFGIVWGFALNMVAIFVAABAAGACWYL
BoCNGC5 : LSVLPVP---QVVLWVWVPSLLKRGSVTLVSVI---LLTFLFQYLPKIIYHSIRHLRQATLSGYIFGIVWGFALNMVAIFVAABAAGACWYL
AtcNGC6 : LSVLPVP---QVVLWVWVPSLLKRGSVTLVSVI---LLTFLFQYLPKIIYHSIRHLRQATLSGYIFGIVWGFALNMVAIFVAABAAGACWYL
Bra026086 : LSVLPVP---QVVLWVWVPSLLKRGSVTLVSVI---LLTFLFQYLPKIIYHSIRHLRQATLSGYIFGIVWGFALNMVAIFVAABAAGACWYL
BoCNGC8 : LSVLPVP---QVVLWVWVPSLLKRGSVTLVSVI---LLTFLFQYLPKIIYHSIRHLRQATLSGYIFGIVWGFALNMVAIFVAABAAGACWYL
AtcNGC7 : LSVLPVP---QVVLWVWVPSLLKRGSVTLVSVI---LLTFLFQYLPKIIYHSIRHLRQATLSGYIFGIVWGFALNMVAIFVAABAAGACWYL
BoCNGC8 : LSVLPVP---QVVLWVWVPSLLKRGSVTLVSVI---LLTFLFQYLPKIIYHSIRHLRQATLSGYIFGIVWGFALNMVAIFVAABAAGACWYL



Bra008733 : AAMLPLP-----QLVIWLVIP--AATNGTANHANSTIALIVLVQYIPRSFIIIFLNQRIIKTTGFIAKLAWAGAAAYNLLYLASHVIGAMWYL  
BoCNGC13 : AAMLPLP-----QLVIWLVIP--AATNGTANHANSTIALIVLVQYIPRSFIIIFLNQRIIKTTGFIAKLAWAGAAAYNLLYLASHVIGAMWYL  
AtCNGC18 : AAMLPLP-----QLVIWLVIP--AATNGTANHANSTIALIVLVQYIPRSFIIIFLNQRIIKTTGFIAKLAWAGAAAYNLLYLASHVIGAMWYL  
Bra018089 : AATLPLP-----QIMWVFIIPNAGEFRYAAHQNHTLSLVVLIQYVPRILVMIPLNRRRIKATGVAAKLAWAGAAAYNLLYLASHVIGAMWYL  
BoCNGC14 : AATLPLP-----QIMWVFIIPNAGEFRYAAHQNHTLSLVVLIQYVPRILVMIPLNRRRIKATGVAAKLAWAGAAAYNLLYLASHVIGAMWYL  
AtCNGC16 : AATLPLP-----QIMWVFIIPNAGEFRYAAHQNHTLSLVVLIQYVPRILVMIPLNRRRIKATGVAAKLAWAGAAAYNLLYLASHVIGAMWYL  
Bra011186 : VATLPLP-----QIVWVFMVMP--ATRSYRFDHNSNDIALIVLVQYIPRFYLIIFLSSQIVKATGVVTKLAWAGAAAYNLLYLASHVIGAMWYL  
BoCNGC10 : VATLPLP-----QIVWVFMVMP--ATRSYRFDHNSNDIALIVLVQYIPRFYLIIFLSSQIVKATGVVTKLAWAGAAAYNLLYLASHVIGAMWYL  
AtCNGC17 : IATLPLP-----QIVWVFMVMP--ATRSYRFDHNSNDIALIVLVQYIPRFYLIIFLSSQIVKATGVVTKLAWAGAAAYNLLYLASHVIGAMWYL  
Bra007839 : IACLPLP-----QIVSWFIFLP--SIRSSSDHTTNAIVLVVLIQYIPRLYLIIFLSAEIIRKATGVVTTLAWAGAAAYNLLYLASHVIGAMWYL  
BoCNGC12 : IACLPLP-----QIVSWFIFLP--SIRSSSDHTTNAIVLVVLIQYIPRLYLIIFLSAEIIRKATGVVTTLAWAGAAAYNLLYLASHVIGAMWYL  
Bra032081 : IACLPLP-----QIVSWFIFLP--SIRSSSDHTTNAIVLVVLIQYIPRLYLIIFLSAEIIRKATGVVTTLAWAGAAAYNLLYLASHVIGAMWYL  
BoCNGC11 : IACLPLP-----QIVSWFIFLP--SIRSSSDHTTNAIVLVVLIQYIPRLYLIIFLSAEIIRKATGVVTTLAWAGAAAYNLLYLASHVIGAMWYL  
AtCNGC14 : IACLPLP-----QIVSWFIFLP--SIRSSSDHTTNAIVLVVLIQYIPRLYLIIFLSAEIIRKATGVVTTLAWAGAAAYNLLYLASHVIGAMWYL  
Bra011963 : VAALPLP-----QVLWIVVIP--NLRGSPMTNKTNRIFIIIFQYVPRMFLIFPLSRQIIRKATGVVTTLAWAGAAAYNLLYLASHVIGAMWYL  
BoCNGC9 : VAALPLP-----QVLWIVVIP--NLRGSPMTNKTNRIFIIIFQYVPRMFLIFPLSRQIIRKATGVVTTLAWAGAAAYNLLYLASHVIGAMWYL  
AtCNGC15 : VAALPLP-----QVLWIVVIP--NLRGSPMTNKTNRIFIIIFQYVPRMFLIFPLSRQIIRKATGVVTTLAWAGAAAYNLLYLASHVIGAMWYL  
Bra021266 : FIVMPLP-----QILILWIIIPAHLGASGANYAKNLLRAAVLIFQYIPKLYRILPILLAG--QTPTGFIFESAWANFVINLLTFMLAGHVVGSCWYL  
BoCNGC21 : FIVMPLP-----QILILWIIIPAHLGASGANYAKNLLRAAVLIFQYIPKLYRILPILLAG--QTPTGFIFESAWANFVINLLTFMLAGHVVGSCWYL  
BoCNGC20 : FIVMPLP-----QILILWIIIPAHLGASGANYAKNLLRAAVLIFQYIPKLYRILPILLAG--QTPTGFIFESAWANFVINLLTFMLAGHVVGSCWYL  
AtCNGC20 : FIVMPLP-----QILILWIIIPAHLGASGANYAKNLLRAAVLIFQYIPKLYRILPILLAG--QTPTGFIFESAWANFVINLLTFMLAGHVVGSCWYL  
BoCNGC22 : FIVMPLP-----QILILWIIIPAHLGASGANYAKNLLRAAVLIFQYIPKLYRILPILLAG--QTPTGFIFESAWANFVINLLTFMLAGHVVGSCWYL  
Bra029958 : FIVMPLP-----QILILWIIIPAHLGASGANYAKNLLRAAVLIFQYIPKLYRILPILLAG--QTPTGFIFESAWANFVINLLTFMLAGHVVGSCWYL  
BoCNGC23 : FIVMPLP-----QILILWIIIPAHLGASGANYAKNLLRAAVLIFQYIPKLYRILPILLAG--QTPTGFIFESAWANFVINLLTFMLAGHVVGSCWYL  
Bra021265 : FIVLPIIP-----QIMTSLIPAHLGTSTAGFERNIIRSTFIIFQYIPKLYRILPILLAG--QTPTGFIFESAWANFVINLLTFMLAGHVVGSCWYL  
BoCNGC24 : FIVLPIIP-----QIMTSLIPAHLGTSTAGFERNIIRSTFIIFQYIPKLYRILPILLAG--QTPTGFIFESAWANFVINLLTFMLAGHVVGSCWYL  
AtCNGC19 : FIVLPIIP-----QIMTSLIPAHLGTSTAGFERNIIRSTFIIFQYIPKLYRILPILLAG--QTPTGFIFESAWANFVINLLTFMLAGHVVGSCWYL  
Bra022232 : LIVLPM-----QIMILSMLPAHLGTPRSELEKNIIRIVLIFQYIPKLYRILPILLAG--QTPTGFIFESAWANFVINLLTFMLAGHVVGSCWYL  
BoCNGC25 : LIVLPM-----QIMILSMLPAHLGTPRSELEKNIIRIVLIFQYIPKLYRILPILLAG--QTPTGFIFESAWANFVINLLTFMLAGHVVGSCWYL  
Bra022233 : VIVYVVP-----QIMILSMLPAHLGTPRSELEKNIIRIVLIFQYIPKLYRILPILLAG--QTPTGFIFESAWANFVINLLTFMLAGHVVGSCWYL  
BoCNGC26 : VIVYVVP-----QIMILSMLPAHLGTPRSELEKNIIRIVLIFQYIPKLYRILPILLAG--QTPTGFIFESAWANFVINLLTFMLAGHVVGSCWYL  
Bra001676 : FIVLPIIP-----QILILWIIIPAHLGTSTAGFERNIIRSTFIIFQYIPKLYRILPILLAG--QTPTGFIFESAWANFVINLLTFMLAGHVVGSCWYL  
BoCNGC18 : FIVLPIIP-----QILILWIIIPAHLGTSTAGFERNIIRSTFIIFQYIPKLYRILPILLAG--QTPTGFIFESAWANFVINLLTFMLAGHVVGSCWYL  
Bra001678 : VIVYVVP-----QIMILSMLPAHLGTPRSELEKNIIRIVLIFQYIPKLYRILPILLAG--QTPTGFIFESAWANFVINLLTFMLAGHVVGSCWYL  
BoCNGC19 : FIVLPIIP-----QILILWIIIPAHLGTSTAGFERNIIRSTFIIFQYIPKLYRILPILLAG--QTPTGFIFESAWANFVINLLTFMLAGHVVGSCWYL  
Bra031529 : FIVMPLP-----QILISWITPAWLGGSWENNAYSIIQAAVILQYITLIRYRILPILLAG--KTPICGIFILES--SKFAINFILTFMLAGHVVGSCWYL

p p q p p g w a h g wy

Bra022702 : LGVQRSACLKEQCENMGCDLRLMSCKEIVYGGTTEM----VLDRLARLAWARNHQ--ARSVCLDIDTDIYGAQWTLQLVSNESR---LEKILFPI-----FWG  
BoCNGC15 : LGVQRSACLKEQCENMGCDLRLMSCKEIVYGGTTEM----VLDRLARLAWARNHQ--ARSVCLDSDTNMAYGAYQWTLQLVSNESR---LEKILFPI-----FWG  
AtCNGC4 : LGVQRSACLKEQCENMGCDLRLMSCKEIVYGGTTEM----VLDRLARLAWARNHQ--ARSVCLDINTNMYGAYQWTLQLVSNESR---LEKILFPI-----FWG  
Bra003001 : LGVQRSACLKEQCENMGCDLRLMSCKEIVYGGTTEM----VLDRLARLAWARNHQ--ARSVCLDINTNMYGAYQWTLQLVSNESR---LEKILFPI-----FWG  
BoCNGC16 : LGVQRSACLKEQCENMGCDLRLMSCKEIVYGGTTEM----VLDRLARLAWARNHQ--ARSVCLDINTNMYGAYQWTLQLVSNESR---LEKILFPI-----FWG  
Bra008699 : LAIQRVASCIRQQCMRTANCNL-SLSCQEEVCYQFVSP----SSTIGFPCVSGNLTSSVKKPCLDSDGPFERYGIYRWALPVISSNSL---AVKILYPI-----FWG  
BoCNGC17 : LAIQRVASCIRQQCMRTANCNL-SLSCQEEVCYQFVSP----SSTIGFPCVSGNLTSSVKKPCLDSDGPFERYGIYRWALPVISSNSL---AVKILYPI-----FWG  
AtCNGC2 : LAIQRVASCIRQQCMRTANCNL-SLSCQEEVCYQFVSP----SSTIGFPCVSGNLTSSVKKPCLDSDGPFERYGIYRWALPVISSNSL---AVKILYPI-----FWG  
Bra004537 : ISIERKDRQWREACAKI---EGCVHGN--LYCS-----GGEDNSQYLIGSCPLMDPEEIKN-STVENFGIFAEALQSGVVESM--DFPKKFFYCF-----WWG  
BoCNGC2 : ISIERKDRQWREACAKI---EGCVHGN--LYCS-----GGEDNSQYLIGSCPLMDPEEIKN-STVENFGIFAEALQSGVVESM--DFPKKFFYCF-----WWG  
AtCNGC3 : ISIERKDRQWREACAKI---EGCVHGN--LYCS-----GGEDNSQYLIGSCPLMDPEEIKN-STVENFGIFAEALQSGVVESM--DFPKKFFYCF-----WWG  
Bra000937 : ISVEREDRCWREACEKR---QGCLELD--LYCDG-----NNNVINDYLTSCFPINPDDITN-STTENFGIFTDALKSGIVKSD--DFWKKFFYCF-----WWG  
BoCNGC1 : ISVEREDRCWREACEKR---QGCLELD--LYCDG-----NNNVINDYLTSCFPINPDDITN-STTENFGIFTDALKSGIVKSD--DFWKKFFYCF-----WWG  
AtCNGC13 : ISVEREDRCWREACEKR---QGCLELD--LYCDG-----NNNVINDYLTSCFPINPDDITN-STTENFGIFTDALKSGIVKSD--DFWKKFFYCF-----WWG  
Bra034281 : ISVEREDRCWREACEKR---QGCLELD--LYCDG-----NNNVINDYLTSCFPINPDDITN-STTENFGIFTDALKSGIVKSD--DFWKKFFYCF-----WWG  
BoCNGC3 : ISVEREDRCWREACEKR---QGCLELD--LYCDG-----NNNVINDYLTSCFPINPDDITN-STTENFGIFTDALKSGIVKSD--DFWKKFFYCF-----WWG  
AtCNGC11 : ISVEREDRCWREACEKR---QGCLELD--LYCDG-----NNNVINDYLTSCFPINPDDITN-STTENFGIFTDALKSGIVKSD--DFWKKFFYCF-----WWG  
Bra003323 : SVEKKNKQWRLECAKI---FGCNLRY--QYCAR-----GRQNGRYLNTCPFLIDPDIQIG-STVENFGIMYTDALRSKGVVESH--DFPKKFFYCF-----WWG  
BoCNGC11 : SVEKKNKQWRLECAKI---FGCNLRY--QYCAR-----GRQNGRYLNTCPFLIDPDIQIG-STVENFGIMYTDALRSKGVVESH--DFPKKFFYCF-----WWG  
AtCNGC12 : SVEKKNKQWRLECAKI---FGCNLRY--QYCAR-----GRQNGRYLNTCPFLIDPDIQIG-STVENFGIMYTDALRSKGVVESH--DFPKKFFYCF-----WWG  
Bra031515 : SVEKKNKQWRLECAKI---FGCNLRY--QYCAR-----GRQNGRYLNTCPFLIDPDIQIG-STVENFGIMYTDALRSKGVVESH--DFPKKFFYCF-----WWG  
BoCNGC3 : SVEKKNKQWRLECAKI---FGCNLRY--QYCAR-----GRQNGRYLNTCPFLIDPDIQIG-STVENFGIMYTDALRSKGVVESH--DFPKKFFYCF-----WWG  
AtCNGC1 : SVEKKNKQWRLECAKI---FGCNLRY--QYCAR-----GRQNGRYLNTCPFLIDPDIQIG-STVENFGIMYTDALRSKGVVESH--DFPKKFFYCF-----WWG  
Bra003081 : FSIERETVQWQACERN---NPPCISK--LYCDP-----ETAGGNAFLNESCPIQTP---N-TTLEDFGIFLDALQSGVVESQ--DFPKKFFYCF-----WWG  
BoCNGC1 : FSIERETVQWQACERN---NPPCISK--LYCDP-----ETAGGNAFLNESCPIQTP---N-TTLEDFGIFLDALQSGVVESQ--DFPKKFFYCF-----WWG  
AtCNGC7 : FSIERETVQWQACERN---NPPCISK--LYCDP-----ETAGGNAFLNESCPIQTP---N-TTLEDFGIFLDALQSGVVESQ--DFPKKFFYCF-----WWG  
Bra020402 : LALERNDAQWQACSDAG---KKICTTG--FLYCGNQNDG--YDWNKTKESVLSKCRADLDD---P-NPPDFGIFLRAALSSGIVSSQ--KFITKYCYCL-----WWG  
BoCNGC7 : LALERNDAQWQACSDAG---KKICTTG--FLYCGNQNDG--YDWNKTKESVLSKCRADLDD---P-NPPDFGIFLRAALSSGIVSSQ--KFITKYCYCL-----WWG  
AtCNGC5 : LALERNDAQWQACSDAG---KKICTTG--FLYCGNQNDG--YDWNKTKESVLSKCRADLDD---P-NPPDFGIFLRAALSSGIVSSQ--KFITKYCYCL-----WWG  
Bra024067 : LALERNDAQWQACSDAG---KKICTTG--FLYCGNQNDG--YDWNKTKESVLSKCRADLDD---P-NPPDFGIFLRAALSSGIVSSQ--KFITKYCYCL-----WWG  
BoCNGC6 : LALERNDAQWQACSDAG---KKICTTG--FLYCGNQNDG--YDWNKTKESVLSKCRADLDD---P-NPPDFGIFLRAALSSGIVSSQ--KFITKYCYCL-----WWG  
AtCNGC9 : LALERNDAQWQACSDAG---KKICTTG--FLYCGNQNDG--YDWNKTKESVLSKCRADLDD---P-NPPDFGIFLRAALSSGIVSSQ--KFITKYCYCL-----WWG  
Bra039221 : LALERNDAQWQACSDAG---KKICTTG--FLYCGNQNDG--YDWNKTKESVLSKCRADLDD---P-NPPDFGIFLRAALSSGIVSSQ--KFITKYCYCL-----WWG  
BoCNGC4 : LALERNDAQWQACSDAG---KKICTTG--FLYCGNQNDG--YDWNKTKESVLSKCRADLDD---P-NPPDFGIFLRAALSSGIVSSQ--KFITKYCYCL-----WWG  
Bra032132 : LALERNDAQWQACSDAG---KKICTTG--FLYCGNQNDG--YDWNKTKESVLSKCRADLDD---P-NPPDFGIFLRAALSSGIVSSQ--KFITKYCYCL-----WWG  
BoCNGC5 : LALERNDAQWQACSDAG---KKICTTG--FLYCGNQNDG--YDWNKTKESVLSKCRADLDD---P-NPPDFGIFLRAALSSGIVSSQ--KFITKYCYCL-----WWG  
AtCNGC6 : LALERNDAQWQACSDAG---KKICTTG--FLYCGNQNDG--YDWNKTKESVLSKCRADLDD---P-NPPDFGIFLRAALSSGIVSSQ--KFITKYCYCL-----WWG  
Bra026086 : LSVERNDTCWRACKVQP---DPKLCVQ--ILYCGTKFVSSRETEWIKTVPELLKSNCSAKADD---AKENYGIYQCAISSGIVSST--TFFSKFCYCL-----WWG  
BoCNGC8 : LSVERNDTCWRACKVQP---DPKLCVQ--ILYCGTKFVSSRETEWIKTVPELLKSNCSAKADD---AKENYGIYQCAISSGIVSST--TFFSKFCYCL-----WWG  
AtCNGC7 : LSVERNDTCWRACKVQP---DPKLCVQ--ILYCGTKFVSSRETEWIKTVPELLKSNCSAKADD---AKENYGIYQCAISSGIVSST--TFFSKFCYCL-----WWG  
BoCNGC8 : LSVERNDTCWRACKVQP---DPKLCVQ--ILYCGTKFVSSRETEWIKTVPELLKSNCSAKADD---AKENYGIYQCAISSGIVSST--TFFSKFCYCL-----WWG  
Bra008733 : SSIGRQFSCWQVCKEDH--ALRVLDCLPSFLDCKS-----LQQPERQYQWNTQVLSHCATSS--TTNFKFGMAEAFQTQVATD---FVSNKYLYCI-----WWG  
BoCNGC13 : SSIGRQFSCWQVCKEDH--ALRVLDCLPSFLDCKS-----LQQPERQYQWNTQVLSHCATSS--TTNFKFGMAEAFQTQVATD---FVSNKYLYCI-----WWG  
AtCNGC18 : SSIGRQFSCWQVCKEDH--ALRVLDCLPSFLDCKS-----LQQPERQYQWNTQVLSHCATSS--TTNFKFGMAEAFQTQVATD---FVSNKYLYCI-----WWG  
Bra018089 : LSIQRQHECWRRECIKEMNATHSPSCNLLFLDCGS-----LRDPGRQAWMRTIRVLSNCDARNDDDQHFQFGMFGDAFTNDVTSSP---FFDKYFYCL-----WWG  
BoCNGC14 : LSIQRQHECWRRECIKEMNATHSPSCNLLFLDCGS-----LRDPGRQAWMRTIRVLSNCDARNDDDQHFQFGMFGDAFTNDVTSSP---FFDKYFYCL-----WWG  
AtCNGC16 : LSIQRQHECWRRECIKEMNATHSPSCNLLFLDCGS-----LRDPGRQAWMRTIRVLSNCDARNDDDQHFQFGMFGDAFTNDVTSSP---FFDKYFYCL-----WWG  
Bra011186 : LSIQRQHECWRRECIKEMNATHSPSCNLLFLDCGS-----LRDPGRQAWMRTIRVLSNCDARNDDDQHFQFGMFGDAFTNDVTSSP---FFDKYFYCL-----WWG  
BoCNGC10 : LSIQRQHECWRRECIKEMNATHSPSCNLLFLDCGS-----LRDPGRQAWMRTIRVLSNCDARNDDDQHFQFGMFGDAFTNDVTSSP---FFDKYFYCL-----WWG  
AtCNGC17 : LSIQRQHECWRRECIKEMNATHSPSCNLLFLDCGS-----LRDPGRQAWMRTIRVLSNCDARNDDDQHFQFGMFGDAFTNDVTSSP---FFDKYFYCL-----WWG  
Bra007839 : LSIQRQHECWRRECIKEMNATHSPSCNLLFLDCGS-----LRDPGRQAWMRTIRVLSNCDARNDDDQHFQFGMFGDAFTNDVTSSP---FFDKYFYCL-----WWG  
BoCNGC12 : LSIQRQHECWRRECIKEMNATHSPSCNLLFLDCGS-----LRDPGRQAWMRTIRVLSNCDARNDDDQHFQFGMFGDAFTNDVTSSP---FFDKYFYCL-----WWG  
Bra032081 : LSIQRQHECWRRECIKEMNATHSPSCNLLFLDCGS-----LRDPGRQAWMRTIRVLSNCDARNDDDQHFQFGMFGDAFTNDVTSSP---FFDKYFYCL-----WWG  
BoCNGC11 : LSIQRQHECWRRECIKEMNATHSPSCNLLFLDCGS-----LRDPGRQAWMRTIRVLSNCDARNDDDQHFQFGMFGDAFTNDVTSSP---FFDKYFYCL-----WWG  
AtCNGC14 : LSIQRQHECWRRECIKEMNATHSPSCNLLFLDCGS-----LRDPGRQAWMRTIRVLSNCDARNDDDQHFQFGMFGDAFTNDVTSSP---FFDKYFYCL-----WWG  
Bra011963 : LAVERQEAQRHACNIEK---PICQYRFFECRR-----LEDPQRNSWFWSNITTICKPGR---FYDFGIFGDAVSTVTSN---FISKYFYCL-----WWG  
BoCNGC9 : LAVERQEAQRHACNIEK---PICQYRFFECRR-----LEDPQRNSWFWSNITTICKPGR---FYDFGIFGDAVSTVTSN---FISKYFYCL-----WWG  
AtCNGC15 : LAVERQEAQRHACNIEK---PICQYRFFECRR-----LEDPQRNSWFWSNITTICKPGR---FYDFGIFGDAVSTVTSN---FISKYFYCL-----WWG  
Bra021266 : FGLQRVNCQLRD--ACGNS---DHECRNLDICG-----RGESSE--AF-AAWKGNASASACFQEDGEGFYGYLKMVNLTHS---LFTRYYSYL-----FWG  
BoCNGC21 : FGLQRVNCQLRD--ACGNS---DHECRNLDICG-----RGESSE--AF-AAWKGNASASACFQEDGEGFYGYLKMVNLTHS---LFTRYYSYL-----FWG  
BoCNGC20 : FGLQRVNCQLRD--ACGNS---DHECRNLDICG-----RGESSE--AF-AAWKGNASASACFQEDGEGFYGYLKMVNLTHS---LFTRYYSYL-----FWG  
AtCNGC20 : FGLQRVNCQLRD--ACGNS---DHECRNLDICG-----RGESSE--AF-AAWKGNASASACFQEDGEGFYGYLKMVNLTHS---LFTRYYSYL-----FWG  
BoCNGC22 : FGLQRVNCQLRD--ACGNS---DHECRNLDICG-----RGESSE--AF-AAWKGNASASACFQEDGEGFYGYLKMVNLTHS---LFTRYYSYL-----FWG  
Bra029958 : FGLQRVNCQLRD--ACGNS---DHECRNLDICG-----RGESSE--AF-AAWKGNASASACFQEDGEGFYGYLKMVNLTHS---LFTRYYSYL-----FWG  
BoCNGC23 : FGLQRVNCQLRD--ACGNS---DHECRNLDICG-----RGESSE--AF-AAWKGNASASACFQEDGEGFYGYLKMVNLTHS---LFTRYYSYL-----FWG  
Bra021265 : SGIERVKKCLLYAAWNS---VDERRNLDICG-----RGNIYASASLRAWRSDSVNACFQESGEGFYGYLKMVNLTHS---LFTRYYSYL-----FWG  
BoCNGC24 : SGIERVKKCLLYAAWNS---VDERRNLDICG-----RGNIYASASLRAWRSDSVNACFQESGEGFYGYLKMVNLTHS---LFTRYYSYL-----FWG  
AtCNGC19 : SGIERVKKCLLYAAWNS---VDERRNLDICG-----RGNIYASASLRAWRSDSVNACFQESGEGFYGYLKMVNLTHS---LFTRYYSYL-----FWG  
Bra022232 : AGLQRVVKCLLH--AGNYT---MDERRNLDICG-----HGVNYARESIALWRDSESVNACFQESGEGFYGYLKMVNLTHS---LFTRYYSYL-----FWG  
BoCNGC25 : AGLQRVVKCLLH--AGNYT---MDERRNLDICG-----HGVNYARESIALWRDSESVNACFQESGEGFYGYLKMVNLTHS---LFTRYYSYL-----FWG  
Bra022233 : AGLQRVVKCLLH--AGNYT---MDERRNLDICG-----HGVNYARESIALWRDSESVNACFQESGEGFYGYLKMVNLTHS---LFTRYYSYL-----FWG  
BoCNGC26 : AGLQRVVKCLLH--AGNYT---MDERRNLDICG-----HGVNYARESIALWRDSESVNACFQESGEGFYGYLKMVNLTHS---LFTRYYSYL-----FWG  
Bra001676 : LGLQRVNCQLRD--ACGN---SSFECKQLIDCG-----RENRTVHLHAWKINVSANACFQEDGEGFYGYLKMVNLTHS---LFTRYYSYL-----FWG  
BoCNGC18 : LGLQRVNCQLRD--ACGN---SSFECKQLIDCG-----RENRTVHLHAWKINVSANACFQEDGEGFYGYLKMVNLTHS---LFTRYYSYL-----FWG  
Bra001678 : LGLQRVNCQLRD--ACGN---SSFECKQLIDCG-----RENRTVHLHAWKINVSANACFQEDGEGFYGYLKMVNLTHS---LFTRYYSYL-----FWG  
BoCNGC19 : LGLQRVNCQLRD--ACGN---SSFECKQLIDCG-----RENRTVHLHAWKINVSANACFQEDGEGFYGYLKMVNLTHS---LFTRYYSYL-----FWG  
Bra031529 : FGLQRVNCQLRD--ACGN---DTRACRELIDCG-----RGSSDVVLAALKYNTSASACFQESGEGFYGYLKMVNLTHS---LFTRYYSYL-----FWG











BoCNGC4 : LRKEEEEEESSAA-----RLIAGGSSPYSIRATFLASRFAANALRGVRKNRTAKL---LALSQPTKELLKVKQKPEPDFSADC-----  
Bra032132 : LRKEEEEEESSAA-----RLIAGGS-PYSIRATFLASKFAANALRSVHKNRIRKS---NLAPPSTKELVKFKQKPEPDFSADC-----  
BoCNGC5 : LRKEEEEEEE-TAA-----RLIAGGS-PYSIRATFLASKFAANALRSVHKNRIRKS---NLAPPSTKELVKFKQKPEPDFSADC-----  
AtCNGC6 : LRKEEEEEEEA-AAA-----SVIAGGS-PYSIRATFLASKFAANALRSVHKNRTAKS---TLLSSTKELVKFKQKPEPDFSAEDH-----  
Bra026086 : RRIEEEEDEMGEYED-EYDDD-----DAEEEDERTPVFTRTESSRLRSTIFASRFAANALRG-HRLRST-----ESSKRLNLQKPEPDFDAE-----  
BoCNGC8 : RRIEEEEDEMGEYED-EYDDD-----DAEEEDERTPVFTRTESSRLRSTIFASRFAANALRG-HRLRST-----ESSKRLNLQKPEPDFDAE-----  
AtCNGC7 : RRIEEEEELGYED-EYDD-----ESDKRPMVITRSESSRLRSTIFASRFAANALRG-HRLRST-----ESSKTLNLQKPEPDFDAE-----  
AtCNGC8 : RRKEEEEEEMDYEDDEYDD-----N-MGGMVTRSDSSVGSSTLRSTVFASRFAANALRG-HKLRVT-----ESSKSLMNLTKPEPDFEALDTDDLN-----  
Bra008733 : LSLHESSGYRDETGYNEEGDE--ENYGSDDDDFEGERLSVDNTNNSQNLGATMLASKFAANTRRGTNQKASSSTSAGKKDGSNSLKMPLFKPEPDFSMDKEDV-----  
BoCNGC13 : LSLHESSGYRDETGYNEEGDE--ENYGSDDDDFEGERLSVDNTNNSQNLGATMLASKFAANTRRGTNQKASSSTSAGKKDGSNSLKMPLFKPEPDFSMDKEDV-----  
AtCNGC18 : LSLHESSGYRDETGYNEEDEETREYYGSDE--EGG--SMDNTN---LGATILASKFAANTRRGTNQKASS--STGKKDGSSTSLKMPLFKPEPDFSIDKEDV-----  
Bra018089 : LARQEEGDDYYDDDD-----DDQYGGEDMPESNN-VDDNSNSQNLSATILASKFAANTRRGVNLGNQRGS---SRIDPDDPTLKMPKMFKPEPDFGFF-----  
BoCNGC14 : LARQEEGDDYYDDDD-----DDQYGGEDMPESNN-VDDNSNSQNLSATILASKFAANTRRGVNLGNQRGS---SRIDPDDPTLKMPKMFKPEPDFGFF-----  
AtCNGC16 : LARQEEEDDYFYDDDG-----DYQF-EEDMPESNNNGDENSSNNQNLSATILASKFAANTRRGVNLGNQRGS---TRIDPDHPTLKMPKMFKPEPDFGFF-----  
Bra011186 : LTAVESKQS-DEDEEEEE---VVVRKVVEEEEEEGVGSPPK-----TKMNLGVMVLASRFAANTRRGVAAQVRVKD-----VEMPRFKKPEPDFSAEPDD-----  
BoCNGC10 : LTAVESKQS-DEE-EEEE---VVVGKVVVEEEEEEGVGSPPN-----TKMNLGVMVLASRFAANTRRGVAAQVRVKD-----VEMPRFKKPEPDFSAEPDD-----  
AtCNGC17 : LTAIESMEN-EEG---E---VGEELVVVEEEECVEESPR-----TKMNLGVMVLASRFAANTRRGVAAQVRVKD-----VELPRFKKPEPDFSAEHDD-----  
Bra007839 : LSLAESYSSYEEEEALAA---AAAEIMSQQEERQSSSTPSRHHTSIGKPHFAATVLASRFAKNTRR---ASRKMKD-----VDVPLPKPEPDFSVDAD-----  
BoCNGC12 : LSLAESYSSYEEEEALAT---AAAEIMSQQEERQSSSTPSRHHTSIGKPHFAATVLASRFAKNTRR---ASRKIKD-----VDVPLPKPEPDFSVDAD-----  
Bra032081 : LSLAESFSSYEEEEAVA---VAAEIMSQQGERQSSNPSRHSTSIGKPHFAATILASRFAKNTRR---TAHKLK-----VEVPLPKPEPDFSVDGD-----  
BoCNGC11 : LSLAESFSSYEEEEAVA---VAAEIMSQQGERQSSNPSRHSTSIGKPHFAATILASRFAKNTRR---TAHKLK-----VEVPLPKPEPDFSVDGD-----  
AtCNGC14 : LSLAESFSSYDEEEAVA---VAATEEMSHHEGAQSGAKARHHTSNVVKPHFAATILASRFAKNTRR---TAHKLK-----VEIPMLPKPEPDFSVDGD-----  
Bra011963 : LRVKEEFQCMFET-----ASM-VRLNSGKPTRSGSDSGMVSS-----IQKPEPDFSSE-----  
BoCNGC9 : LRVKEEFQCMFET-----ASM-VRLNSGKPTRSGSDSGMVSS-----IQKPEPDFSSE-----  
AtCNGC15 : LRAKEEFHYRFEA-----ATARLAVNGGKYTRSGSDSGMMSS-----IQKPEPDFSSE-----  
Bra021266 : TAQS-SYSL-----  
BoCNGC21 : TAQS-SYSL-----  
BoCNGC20 : TDQS-SYSL-----  
AtCNGC20 : TPQS-SYSL-----  
BoCNGC22 : SAQS-SYSL-----  
Bra029958 : TAQKKQYSSSELIQKDMAKT-----  
BoCNGC23 : TAQKKQYSSLELIKDMAKT-----  
Bra021265 : TAQSTSR-----  
BoCNGC24 : TAQSTSR-----  
AtCNGC19 : TAHSNSNR-----  
Bra022232 : LQDNRMKEMSDVRIQYRLSWSGVVEGSGKQLDTRGSS-----  
BoCNGC25 : LQDNRMKEMSDVPIQYRLSWSGVVEGSGK-----  
Bra022233 : KKQNGDIDE-----  
BoCNGC26 : RKQNGEMDE-----  
Bra001676 : -----  
BoCNGC18 : -----  
Bra001678 : -----  
BoCNGC19 : -----  
Bra031529 : -----

\* 1060 \* 1080

Bra022702 : -----  
BoCNGC15 : -----  
AtCNGC4 : -----  
Bra003001 : -----  
BoCNGC16 : -----  
Bra008699 : -----  
BoCNGC17 : -----  
AtCNGC2 : -----  
Bra004537 : -----  
BoCNGC2 : -----  
AtCNGC3 : -----  
Bra000937 : -----  
BoCNGC1 : -----  
AtCNGC13 : ALRNLRAAAAARNSRFPHMLTLLPQKPADPEFPMDET  
AtCNGC10 : -----  
Bra034281 : -----  
BoCNGC3 : -----  
AtCNGC11 : -----  
AtCNGC12 : -----  
Bra003323 : -----  
Bra031515 : -----  
Bra022632 : -----  
AtCNGC1 : -----  
Bra003081 : RSL-----  
Bra020402 : -----  
BoCNGC7 : -----  
AtCNGC5 : -----  
Bra024067 : -----  
BoCNGC6 : -----  
AtCNGC9 : -----  
Bra039221 : -----  
BoCNGC4 : -----  
Bra032132 : -----  
BoCNGC5 : -----  
AtCNGC6 : -----  
Bra026086 : -----  
BoCNGC8 : -----  
AtCNGC7 : -----  
AtCNGC8 : -----  
Bra008733 : -----  
BoCNGC13 : -----  
AtCNGC18 : -----  
Bra018089 : -----  
BoCNGC14 : -----  
AtCNGC16 : -----  
Bra011186 : -----  
BoCNGC10 : -----  
AtCNGC17 : -----  
Bra007839 : -----  
BoCNGC12 : -----  
Bra032081 : -----  
BoCNGC11 : -----  
AtCNGC14 : -----  
Bra011963 : -----  
BoCNGC9 : -----  
AtCNGC15 : -----  
Bra021266 : -----  
BoCNGC21 : -----  
BoCNGC20 : -----  
AtCNGC20 : -----  
BoCNGC22 : -----  
Bra029958 : -----  
BoCNGC23 : -----  
Bra021265 : -----  
BoCNGC24 : -----  
AtCNGC19 : -----  
Bra022232 : -----  
BoCNGC25 : -----  
Bra022233 : -----  
BoCNGC26 : -----  
Bra001676 : -----  
BoCNGC18 : -----  
Bra001678 : -----  
BoCNGC19 : -----  
Bra031529 : -----
