# Supplementary material for: Comprehensive genomic analysis of the CNGC gene family in Brassica oleracea: novel insights into synteny, structures, and transcript profiles
Source: PubMed Central journal article supplement (PMC5683364; doi:10.1186/s12864-017-4244-y), 2017-11-13
Supplement: 12864_2017_4244_MOESM8_ESM.pdf [file 12864_2017_4244_MOESM8_ESM.pdf]

**Additional file 8. Multiple sequence alignment of BoCNGC proteins.** Multiple sequence alignment was performed by clustalX2 and viewed by GeneDoc software package.

```

*      20      *      40      *      60      *      80      *      100      *      120      *      140      *
BoCNGC15 : -----MATEQEFTR-----ASRVSGASS-----SVGCYSDYDYEKDEEEEEEEEEEMEE----- : 43
BoCNGC16 : -----MATEQEFTR-----ASRVSGASS-----SIGYSDYDYEKDEEEEEEEEEEMEEQ----- : 43
BoCNGC17 : -----MPSHTNFLFRWIGLFSQKLR-----ETTGISENNNGVGESSSDTTPVLSGGEYACTQVGV-----PA : 58
BoCNGC2 : -----MEMNLRNTFV-----FTENEDSWNRPSVTSVIKKTVRRSF----- : 38
BoCNGC3 : -----MERA-----STMQS-----VHEN-----IKSVRG----- : 19
BoCNGC1 : -----MGFGRDNRVRWF-----EPSSTEYGYGRRARPSLNAVLNVRRGF----- : 41
BoCNGC4 : -----MESKSQVISGHREKFI-----LDSMDPR-----SPEAGLNRCNLNIQRPKRFTQAT----- : 47
BoCNGC5 : -----MFDCTGNGVKSQVISGHREKFI-----LESMDSRYSQSSDNTGLNKCTLNQAPKRFAGGS----- : 57
BoCNGC6 : -----MFDCKVKSQVISGHREKFI-----LDSMDSRYSQ-----GSEAGLSKCTLNQGGSRANGGTG-----QG : 59
BoCNGC7 : -----MAGKPKQTFVSVDDDFKLPSSSSSLTRQHNYSISSISGPHPIQGS----- : 44
BoCNGC8 : -----MYKSQVISGHREKFI-----LDDLDSS-----ASHATGMMTKRNCFGFPVKNRGSE----- : 47
BoCNGC11 : -----MEFKRDNTV-----FYGDEKQILEVTEKRLPLPMFKSSAAL----- : 37
BoCNGC12 : -----MEFKRDNTV-----FYGEEKQILEATEKRQPLPMLKPTTQ----- : 37
BoCNGC10 : -----MELSKDKLLMLYS-----DKKEPKAIAWAVN-----DPMSKSYKLS----- : 36
BoCNGC13 : -----MNKIRSL-----FL-----LPETITSAAS----- : 20
BoCNGC14 : -----MSNLHLHTSAR-----FRN-----FPTAFSRRHH----- : 24
BoCNGC9 : -----MGYGNRSRVS-----FEEDSEVTKPQAVHEETAEKLFKING----- : 37
BoCNGC18 : MASPENDDVPMPLPASDTSSSS-RIMPFTSRSRSTSLANNSSTIDVF-NSSTVVLYGYNHLGTQRRPP-LVQMSDPLS-STRSPEPRFALPPPS-----TGASSDSVVGAS : 101
BoCNGC19 : MASSNGYDDVPMPLFVSDTSSSS-RTRPFTSRSRSVLSLNTSSTIDVFENSSSTVVLSYTDPLGTQRQPQ-LVQMGDPIS-STRN-----LELVS-----KHAHP--YGIT : 94
BoCNGC20 : ---MEKDDVPMPLFVSDSSSLS-RTRPFTSRSRSVSLANTSSIIDGF-DSSTVVLYGTYGFLRTRRRPP-LVQMSGPLS-STRSPEPLFLPPP-----STRDVSSSQPERYPSFATALEHKNS-EEFVLKHAHLRSGQLGMCNDPYCTT : 137
BoCNGC21 : MASPENDDVPMPLFISDTS---RTRPFTSRSRSVLSLNTSSTIDGF-DSSTVVLYGTYGFLRTRRRPP-LVQMSGPLS-STRNPEPLFLPPP-----SVG-ISSSQPERYPSFATALEHKNS-DDEFVLKHAHLRSGQLGMCNDPYCTT : 137
BoCNGC22 : MAPPNEKDDVPMPLFISSSSSSS-RTRPFTSRSRSTSLANTSSAIDGF-DSSNVVLYGTYGFLQTYGRPA-FVQMSASLP-STLIPEPLFLHPTPTGGSSHSIG-VSSSQPERYPSFATALEHKNS-DDELGLG-----SQLEVCNDPYCTT : 138
BoCNGC23 : MVSPNKDKRIHILPISDASSSSQTRVFTSRTRSVPLSNPTDETG---NSNAVILGYAGSLLSQ-RPP-LVPMGTGLSSSTRPEPLFRPAP-----PTRRSSGYFGDLEEVNSSDNDLKHHLRSGQLGMCNDPYCTT : 134
BoCNGC25 : MASPNEKDEFPIILPVSEARPRANTRALNSRNRSVSFSNSTYSTNRV-DNSSVLYGTYGFLRTRRRPPSVQMSGPLYSTRRP-DQSFPPSP-----VQPPDSSLSS-TVDVPSEED-EVVLKNAHLRSGQLGMCNDPYCTT : 136
BoCNGC26 : MAYPNEDEFPIILPVSEARPRANTRALNSRNRSVSFSNSTYSTNRV-ENS-----SGPRRTQSRPSPSVHMSGPLYDTRRPPDQSFPPSP-----VQPPDSSLSSSTTVDIPSEEVVEALLKNAHLRSGQLGMCNDPYCTT : 133
BoCNGC24 : MISPENDDVPMPLFISDASSSSQTRVFTSRTRSVPLSNPTDETG---NSNAVILGYAGSLLSQ-RPP-LVPMGTGLSSSTRPEPLFRPAP-----GPLYSTRP--ESLLPPS-----IEPPDS---SSTVDVRSDE--SVVKNAHLRSGQLGMCNDPYCTT : 120

160      *      180      *      200      *      220      *      240      *      260      *      280      *      300
BoCNGC15 : -ETEKEDEEEEPVVRVTCG-----GRR-NGSPGYSYNKMMMLG---RILDRSKLVQENRNVFLLVATGELVDFELFLITLISVN---DACMCHLVIGWLALTLVTRVRSVIDLLHLWNLIIQFKIARRWEPSPGDSGDGINKED : 172
BoCNGC16 : -EEE-EEEEETHVGVTCG-----IRRRNGSSSYNKMMLG---RILDRSKLVQENRNVFLLVATGELVDFELFLITLISVN---DACMCHLVIGWLALTLVTRVRSVIDLLHLWNLIIQFKIARRWEPSPGDSGDGINKED : 172
BoCNGC17 : FHSTCDQANAPEWRASAGSSLPV-----IQEGSAPDPVRAFRRRLKGFGEVLDERSKLVQENRNVFLLVATGELVDFELFLITLISVN---TGPACTLYMGAFVAVVTVVTRTCLDALHLWVWVWVQFLA---YVSRDS---LVVVC : 193
BoCNGC2 : -----ERKSEKIRNFKQPLT-----FHSQKKNENKKKIIRVMNENDSYLQNNRIFLLLCVVAFAFDPEFFFPVDFPG---RFOKLLKKLEAVACVFRDFIDAFYVWVHMLFQFNTG---FIAPSS---RGER : 155
BoCNGC3 : -----QLKKVYKTLN---TLENARKAILLVCVVAFAFDPEFFFPVDFPG---NFCFTEFKKLAAVVSAIRTFIDTFYVHIFIFNEITE---FIAPSS---QVSLR : 108
BoCNGC1 : -----ERKSDKIRTFKKPLSFN-----SHKNEEKRNATGQKKNILNQGSELQNNRIFLLLCVVAFAFDPEFFFPVDFPG---KHCINLHSSLEIAASVLRDFVDAFYIIEVVFQFRTA---YVSPDS---RVER : 161

BoCNGC18 : MASPENDDVPMPLPASDTSSSS-RIMPFTSRSRSTSLANNSSTIDVF-NSSTVVLYGYNHLGTQRRPP-LVQMSDPLS-STRSPEPRFALPPPS-----TGASSDSVVGAS : 101
BoCNGC19 : MASSNGYDDVPMPLFVSDTSSSS-RTRPFTSRSRSVLSLNTSSTIDVFENSSSTVVLSYTDPLGTQRQPQ-LVQMGDPIS-STRN-----LELVS-----KHAHP--YGIT : 94
BoCNGC20 : ---MEKDDVPMPLFVSDSSSLS-RTRPFTSRSRSVSLANTSSIIDGF-DSSTVVLYGTYGFLRTRRRPP-LVQMSGPLS-TRNPEPLFLPPP-----TSTRDVSSSQPERYPSFATALEHKNS-EEFVLKHAHLRSGQLGMCNDPYCTT : 137
BoCNGC21 : MASPENDDVPMPLFISDTS---RTRPFTSRSRSVLSLNTSSTIDGF-DSSTVVLYGTYGFLRTRRRPP-LVQMSGPLS-TRNPEPLFLPPP-----DSVG-ISSSQPERYPSFATALEHKNS-DDEFVLKHAHLRSGQLGMCNDPYCTT : 137
AtCNGC20 : MASHNENDVPMPLFISDPSRT-RARAFTRSRSRSVLSNPTSSIEGF-DTSTVVLYGTYGFLRTRRRPP-LVQMSGPLS-TRKHEPLFLPHPS---DSVG--VSSQPERYPSFAALEHKNSSEDEFVLKHAHLRSGQLGMCNDPYCTT : 141
BoCNGC22 : MAPPNEKDDVPMPLFISSSSSSS-RTRPFTSRSRSTSLANTSSAIDGF-DSSNVVLYGTYGFLQTYGRPA-FVQMSASLP-STLIPEPLFLHPTPTGGSSHSIG-VSSSQPERYPSFATALEHKNS-DDELGLG-----SQLEVCNDPYCTT : 138
BoCNGC23 : MVSPNKDKRIHILPISDASSSSQTRVFTSRTRSVPLSNPTDETG---NSNAVILGYAGSLLSQ-RPP-LVPMGTGLSSSTRPEPLFRPAP-----PTRRSSGYFGDLEEVNSSDNDLKHHLRSGQLGMCNDPYCTT : 134
BoCNGC24 : MISPENDDVPMPLFISDASSSSQTRVFTSRTRSVPLSNPTDETG---NSNAVILGYAGSLLSQ-RPP-LVPMGTGLSSSTRPEPLFRPAP-----GPLYSTRP--ESLLPPS-----IEPPDS---SSTVDVRSDE--SVVKNAHLRSGQLGMCNDPYCTT : 120
AtCNGC19 : -----MAHTFTFTSRNRSVLSNPSFIDGF-DNSTVILGYTGLRTRRPPVQMSGPIHSTRRT---EPLFSPSP-----QESPDS---SSTVDVPPEDD---FVFKNAHLRSGQLGMCNDPYCTT : 110
BoCNGC25 : MASPNEKDEFPIILPVSEARPRANTRALNSRNRSVSFSNSTYSTNRV-DNSSVLYGTYGFLRTRRRPPSVQMSGPLYSTRRP-DQSFPPSP-----VQPPDSSLSS-TVDVPSEED-EVVLKNAHLRSGQLGMCNDPYCTT : 136
BoCNGC26 : MAYPNEDEFPIILPVSEARPRANTRALNSRNRSVSFSNSTYSTNRV-ENS-----SGPRRTQSRPSPSVHMSGPLYDTRRPPDQSFPPSP-----VQPPDSSLSSSTTVDIPSEEVVEALLKNAHLRSGQLGMCNDPYCTT : 133

```

BoCNGC4 : ---KASSGSFKKGRKSGEGLWSI-----GRSIGLGVSRVAVPEDLEVSEKKIFDEQDKFILLNCKLFVASCILAVSDPDLFLYLPFFINDK---AKVCGIDRKLAIVATTTTRTVIDSFILFFHMAIRFRTA---YVAPSS---RVFGR : 177  
 BoCNGC5 : ---KTSSSGFKNGFRKSGEGLWSI-----GRSIGLGVSRVAVPEDLVKVEKKIFDEQDKFILLNCKLFVASCILAVSDPDLFLYLPFFINDK---AKVCGIDRKLAIVATTTTRTVIDSFILFFHMAIRFRTA---YVAPSS---RVFGR : 187  
 BoCNGC6 : NNNNASSGSFKKGRKSGEGLWSL-----GRSIGL-VSRVAVPEDLVKVEKKIFDEQDKFILLNCKLFVASCILAVSDPDLFLYLPFFINDS---GKCGIDRRLATIAATTTTRTFIDVFNLFHMAIQFRTA---YVAPSS---RVFGR : 191  
 BoCNGC7 : ---HNASSGSFKKRFQKSGKGLKSI-----GRSLGFGVYRAVFPEDLVKVEKKIFDEQDKTILLFCNLFVASCILAVSDPDLFFLYLPVINGE---SKCGIDRKLAIATTTTRTFIDVFNLAHMAIQFRTA---YIAPSS---RVFGR : 174  
 BoCNGC8 : --KKRASKSFREGVKIGSEGLFSI-----GK----SVTRAVFPEDLRISEKKIFDEQDKTILLNRMVLVISCILAVSDPDLFFLYLPVINDSG---SSCGIDTKLAVTTTTTRTIDVFNLFHMAIQFRTA---YIAPSS---RVFGR : 175  
 BoCNGC11 : -----FQKQELGTSKKS-----I-----FKIPRFGRKFVFPENFEIERDKILDEGGDVVLQNRVFLFWCLVALAVSDPDLFFLYLVSVRT-GRSSCTTDLNKLGIIVTFTRTLADLFVFLHIVIKFRTA---YVSRIS---RVFGR : 160  
 BoCNGC12 : -----FLKPELVIPKTKNTRL-----FKLPRFGGLKVFPEPFEIERDKILDEGGDVVLQNRVFLFWCLVALAVSDPDLFFLYLSSVNT-GRSSCTTDLNKLGIIVTFTRTLADLFVFLHIVIKFRTA---YVSRIS---RVFGR : 164  
 BoCNGC10 : -----LPSALKPPFDNLLAG-----NRISRYTDNNKTKSSKLSWYKTLDEGSEIVLKNWVFIISCMALVLEIDELIYFVPAIGGN-KDYFCAKTIDNLRILVTFTRTLADLFVFLHIVIKFRTG---FIAPNS-TRVGR : 163  
 BoCNGC13 : -----NRGSVA-----VRYGSQLVFWR-HCILLDESSIVTYNHNHFLVTSILALDELIDELIYFVPAIVG---GPACTIDVVGLAATVTFTRSVADLFHLLHIFMKFRTA---FVARSS---RVFGR : 124  
 BoCNGC14 : -----NNDLQ-----NQRGRSVFSELGDTTLDSEGGDITRNHIFLITCLLALDELIDELIYFVPAIVQA---GTACSIDIGFGILVTFTRTLADLFVFLHIVIKFRTA---FVSKSS---RVFGR : 130  
 BoCNGC9 : -----AQISPRKNVKKMTRG-----KSFKAKVLSRVFTEDLGRVKNKILDEGGDITRNHIFLITCLLALDELIDELIYFVPAIVG---KEACTIDIGRLEVVLTIVIRSLADAFVIAQIVIRFRTA---YIAPSS---RVFGR : 159  
 BoCNGC18 : SSQPNERNHAYSRTPRVFATSDF-----TLHNALDDDAKWA-----KYFSGITTFESNFVQITTFEALSCLSEVDPDLFFLYPIETK---EERCKIDWTTNVFVIVRSITDGLVALNIVLQER---LAVDLES---TVVGA : 229  
 BoCNGC19 : CPSYDNERAAQIPTPRV---SDS-----MVHNARDDDAKGWARREAFATSVDKYLPKIMENHSKVFQSTTFEAFSCLLSEVDPDLFFLYPIEVGQ---SGKCRIDEEDMAIVLVALRSITDVLVFNVDLQCR----- : 213  
 BoCNGC20 : CPSYDNRKAAQIPTRVSAIFDS---TFH-----DAKGWARREAFATINRHLPGIMNHSKVFQSTTFEAFSCLLSEVDPDLFFLYPIEVGQ---NNKCIDWVMAHTFVAVRSVTDVLSVNDLQ---FRLAYVAPES---TVVGA : 268  
 BoCNGC21 : CPSYDNRKAAQIPSSRVSAFFDS---KFHNALYDDAKGWARREAFATANRYLPGIMNHSKVFQSTTFEAFSCLLSEVDPDLFFLYPIEVGQ---NDKCIDWVMAHTFVAVRSVTDVLSVNDLQ---FRLAYVAPES---TVVGA : 273  
 BoCNGC22 : CPSYDNPFAQIPPS-----KLHAMCDDARGWATRFVTSINKFLTCIMNHSKVFQSTTFEAFSCLLSEVDPDLFFLYPIEVGQ---NDKCIDWVMAHTFVAVRSVTDVLSVNDLQ---FRLAYVAPES---TVVGA : 264  
 BoCNGC23 : CPSYDNPFAQIPNPTVS---AS-----TFHNALYDDARGWARRFASVNRCLPGIMNHSKVFQSTTFEAFSCLLSEVDPDLFFLYPIEVGQ---NNKCIDWVMAHTFVAVRSVTDVLSVNDLQ---FRLAYVAPES---TVVGA : 271  
 BoCNGC25 : CPSYDNRKAAQFHTNRVSDSR-----FRATALYDDARGWAKRFASSVRKLPKIMNHSKVFQSTTFEAFSCLLSEVDPDLFFLYPIEVGQ---NDKCIDWVMAHTFVAVRSVTDVLSVNDLQ---FRLAYVAPES---TVVGA : 270  
 BoCNGC26 : CPSYDNLQAAQFHTYGVVSDSRTQVNATHNRQALHDYDRGWDKLEASYVRRCPVPGIMNHSKVFQSTTFEAFSCLLSEVDPDLFFLYPIEVGQ---NDKCIDWVMAHTFVAVRSVTDVLSVNDLQ---FRLAYVAPES---TVVGA : 266  
 BoCNGC24 : CPSYDNRKAAQFHTYGVVSDSRTQVNATHNRQALHDYDRGWDKLEASYVRRCPVPGIMNHSKVFQSTTFEAFSCLLSEVDPDLFFLYPIEVGQ---NDKCIDWVMAHTFVAVRSVTDVLSVNDLQ---FRLAYVAPES---TVVGA : 253

p 6 w c 6 DP15 C d R3 D 6 s g

BoCNGC15 : \* GTRTRT--RVAPPVKKNG--FFDIFVILPLPQVVLLVWVIFPSLLKRGSVTLVVSIVLLIFLQYLPKTIYHSIRHLRARNATLSEYIFGIVWVGIALNMAVAVPAFAAGACWYLLGVQFSAKGLKEQCENTIMG-----CDLRMLSCREPVY : 314  
 BoCNGC16 : \* ETRRTSRVAPPVKKKGTFFDIFVILPLPQVVLLVWVIFPSLLKRGSVTLVVSIVLVIFLQYLPKTIYHSVRHLRQNTLSEYIFGIVWVGIALNMAVAVPAFAAGACWYLLGVQFSAKGLKEQCENTIMG-----CDLRMLSCREPVY : 317  
 BoCNGC17 : \* GKLWDPRLAASHNARSLTGWFVDFVIVLVPQAVFWLWVPLKIREEKVKLIMTILLIFLQYLPKTIYHCIMRRMQVTVTYIFGILWGFALNLIAMFIASHVAGGCWYVLAIQRVASQIRQCMTAN-----CNL-SLSCQEVG : 337  
 BoCNGC2 : \* GELVQSYKKAIVRYL--KSYEIIDVLSILPLPQVVLLAVVPSMGRPASLVT-KELDKWVIFQYVPRIRIYPLFKEVTRTSELVTEAWAGAALNDFLYMLASHVFCALWYLLISVEREDROWREACKIK-----GCIHAYLYCGGG-E : 296  
 BoCNGC3 : \* GELVHSHKATRKRL--FFHIVDVCVPIPIQVVVLLIILH---RSDSLVS-QALDKWIIITQVVPRIIRIYPLKKEVTRASCIATKQVGAFFNDFLYMLASHVFCALWYLLISVEREDROWREACKIK-----GCIHAYLYCGGG-E : 247  
 BoCNGC1 : \* GELVEDPKAIALKYL--SSYEIIDVLSILPLPQVVLLAVVPSMGRPASLVT-KDYIITVIFAQYIPRIRIYPLSEVTRTSELVTEAWAGAALNDFLYMLASHVFCALWYLLISVEREDROWREACKIK-----GCIHAYLYCGGG-E : 303  
 BoCNGC4 : \* GELVIDPAQIAKRYL--QQYEIIDVLSVLPQIVVWRFLY-TSGANVLAATKQALRYIVLVQYIPRFLRYPLSELKRTAGVFAETAWAGAAYYLLLYMLASHVFCALWYLLISVEREDROWREACKIK-----GCIHAYLYCGGG-E : 319  
 BoCNGC5 : \* GELVIDPAQIAKRYL--QQYEIIDVLSVLPQIVVWRFLY-TSGANVLAATKQALRYIVLVQYIPRFLRYPLSELKRTAGVFAETAWAGAAYYLLLYMLASHVFCALWYLLISVEREDROWREACKIK-----GCIHAYLYCGGG-E : 329  
 BoCNGC6 : \* GELVIDPAQIAKRYL--QQYEIIDVLSVLPQIVVWRFLY-TSTGGSVLETKQALRSIILVQYIPRFRRIYPLSELKRTAGVFAETAWAGAAYYLLLYMLASHVFCALWYLLISVEREDROWREACKIK-----GCIHAYLYCGGG-E : 334  
 BoCNGC7 : \* GELVIDPAQIAKRYL--QRWEIIDVLSVLPQIVVWRFLY-RSRGSDVLAATKQALRSIILVQYIPRFLRYPLSELKRTAGVFAETAWAGAAYYLLLYMLASHVFCALWYLLISVEREDROWREACKIK-----GCIHAYLYCGGG-E : 318  
 BoCNGC8 : \* GELVIDPAQIAKRYL--TRYEIVDFLAVLPLPQIVVWRFLY-GSKGMDVLPKTKALNIVITQYIPRFRRIYPLSELKRTAGVFAETAWAGAAYYLLLYMLASHVFCALWYLLISVEREDROWREACKIK-----GCIHAYLYCGGG-E : 319  
 BoCNGC11 : \* GELVKDPKIAKRYL--RSDIIVDIYACLPQIVVWRFLY-SIRSSHSHTTNAVLLVIVQYIPRILYPLSAEIIKATEVVTTAWAGAAYYLLLYMLASHVFCALWYLLISVEREDROWREACKIK-----GCIHAYLYCGGG-E : 308  
 BoCNGC12 : \* GELVKDPKIAKRYL--RSDIIVDIYACLPQIVVWRFLY-SIRSSHSHTTNAVLLVIVQYIPRILYPLSAEIIKATEVVTTAWAGAAYYLLLYMLASHVFCALWYLLISVEREDROWREACKIK-----GCIHAYLYCGGG-E : 308  
 BoCNGC10 : \* GELVMDPKAIAKRYL--KSEIIVDIYACLPQIVVWRFLY-ATRSYRFDHSNNDVLLVIVQYIPRIFLYPLSSQIVKATEVVTTAWAGAAYYLLLYMLASHVFCALWYLLISVEREDROWREACKIK-----GCIHAYLYCGGG-E : 308  
 BoCNGC13 : \* GELVDRPDKAIAKRYL--KSEIIVDIYACLPQIVVWRFLY-AATNGTANHANSTVLLVIVQYIPRIFLYPLNQRIIKTEVFAIAKTAWAGAAYYLLLYMLASHVFCALWYLLISVEREDROWREACKIK-----GCIHAYLYCGGG-E : 270  
 BoCNGC14 : \* GELVDRPDKAIAKRYL--KSEIIVDIYACLPQIVVWRFLY-ATRSYRFDHSNNDVLLVIVQYIPRIFLYPLNQRIIKTEVFAIAKTAWAGAAYYLLLYMLASHVFCALWYLLISVEREDROWREACKIK-----GCIHAYLYCGGG-E : 278  
 BoCNGC9 : \* GELVIDSRKIAKRYL--NKSQIIVDIYACLPQIVVWRFLY-NLRGSPMTNTKNTVRFIIFQYVPRMFLYPLSRQIIKATEVVTTAWAGAAYYLLLYMLASHVFCALWYLLISVEREDROWREACKIK-----GCIHAYLYCGGG-E : 301  
 BoCNGC18 : \* GQLVDDPKKIAKRYL--GKELTIDFIVLPIPIQIILLWVIFPQLLGTSGANNTKNYRAAIVLVQYIPRILRYPLLAGQT-PRGFRFDSALAKFFINLITFMLAGHVGISGWYLLGLQFVNQCLRDAG-GNSS-----FECKQIDCGRENR : 371  
 BoCNGC19 : \* -----VNRCLR-----ETCEDHMDKCHVEVCKELIDCGLHK-----EKIDICERRNT : 256  
 BoCNGC20 : \* GQLVDHPRKIAKRYL--GKELTIDFIVMPLPQIILLWVIFPAHLAISGANYAKNLRAAVLFQYIPRILRYPLLAGQT-PTGFIFESAWANFIIINLTFILAGAVGSCWYLLGLQFVNQCLRDAG-GNTD-----RPRELIDCGHGT : 409  
 BoCNGC21 : \* GQLVAHPRKIAKRYL--GKELTIDFIVMPLPQIILLWVIFPAHLAISGANYAKNLRAAVLFQYIPRILRYPLLAGQT-PTGFIFESAWANFIIINLTFILAGAVGSCWYLLGLQFVNQCLRDAG-GNSD-----HECRNIDCGRGDS : 415  
 BoCNGC22 : \* GHLFDHPRKIAKRYL--VKEIIDLIVMPLPQIIFWVLPVQLGASGDNYAKNLRAAVLFQYIPRILRYPLLAGQT-PTVFLFESACSS-FVTNITFMLVGVVGSWYLLGLQFVNQCLRDAG-GNSH-----QCRELIDCGHGN : 405  
 BoCNGC23 : \* GQLVDRPKIAKRYL--GYEIVDIIVMFPQIVLVVPAQLAISGTNYAKNLRAGIIVQYIPRILRYPLLAGQT-PTGFIFESAWANFIIINLTFILAGAVGSCWYLLGLQFVNQCLRDAG-GHSG-----RECRNIDCGHGN : 413  
 BoCNGC25 : \* GQLVDHPRKIAKRYL--GKELTIDFIVMPLPQIILLWVIFPAHLGTPRSELEKNIIRIVLFQYIPRILRYPLLAGQT-PTGFIFESAWANFIIINLTFILAGAVGSCWYLLGLQFVNQCLRDAG-NYTM-----DERRNIDCARGVN : 412  
 BoCNGC26 : \* GQLVDHPRKIAKRYL--GKELTIDFIVMPLPQIILLWVIFPAHLGTPRSELEKNIIRIVLFQYIPRILRYPLLAGQT-PTGFIFESAWANFIIINLTFILAGAVGSCWYLLGLQFVNQCLRDAG-NYTM-----DERRNIDCARGVN : 402  
 BoCNGC24 : \* GQLVDHPRKIAKRYL--GKELTIDFIVLPIPIQIILLWVIFPQLLGTSGANNTKNYRAAIVLVQYIPRILRYPLLAGQT-PTGFIFESAWANFIIINLTFILAGAVGSCWYLLGLQFVNQCLRDAG-NYTM-----DERRNIDCARGVN : 396

g l a y f d p q q q p p l g aw 6 6a h g wy c c C

BoCNGC15 : 460 \* YGTTEMVLDRLARLAWARNHQ---ARSVCLSDTNYTYGAYQWTIQLVSNES---RLEKILFPIFWGIMTLSTFGN-LESTTEWSEVVENIIVLTSGLLIVTMLIGNIKVFLHATTS-----RQKQAMHLKMRN : 434  
 BoCNGC16 : YGTTEMVLDRLARLAWAQNQQ---ARSICLDINTNYTYGAYKWTIQLVSNES---RLEKILFPIFWGIMTLSTFGN-LESTTEWSEVVENIIVLTSGLLIVTMLIGNIKVFLHATTS-----RQKQAMHLKMRN : 437  
 BoCNGC17 : YQFVSPSTSIGFCLSGNLTSVVKKFEMCLDSNGHFYRGLYGNALPVISSN---LAVLILYPIFWGIMTLSTFGNLESTTEWSEVVENIIVLTSGLLIVTMLIGNIKVFLHATTS-----RQKQAMHLKMRN : 461  
 BoCNGC2 : DNSQYLIGSCPLMDPEEIKNST-----VENEGTEAEALQSGVPE--MDFFPKKFFCFWNGLRNLSALGQNKITSAFEGEITIAVITICISGLVLEALLIGNMOKYLOSTTV-----RVDMDRVRKRR : 411



BoCNGC3 : NNGRYLNTTCPLIDPDQIIGST-----VNFNGYTDALRSQIVGSKPRDFPRFFFCFWWGLRNLSALGQNLKTSNSVGDIVFALITICVSGLLFVAVLIGNICKYLCSTTI-----FLDMEBKKRD : 364  
 BoCNGC1 : VINDYLTTSCPFINPDDITNST-----TFNFGIFTDALKSGIVG--DDFWKFFFCFWWGLRNLSALGQNLKTSKVFGEIIFAVLITICISGLVLFALLIGNMCKYLCSTTV-----REEMRVKRRD : 418  
 BoCNGC4 : KG-YDAWDDVKDFLQLRCPVNVTDGE---EPFDFGTYLRALSSGIVS--KKFVSKYFFCLWWGLQNLSTLGGLETSTYVGEVIFSTALAIAGLLFALLIGNMCKYLCSTTI-----RLEEMRVKRRD : 440  
 BoCNGC5 : EG-YAAWYTAKSVFLQEKCPVNVTEGE---EPFDFGTYLRALSSGIVS--KKFVSKYFFCLWWGLQNLSTLGGLETSTYVGEVIFSTALAIAGLLFALLIGNMCKYLCSTTI-----RLEEMRVKRRD : 450  
 BoCNGC6 : DG-YAAWNTIKESVLQKSCFPVNVTDGD---NPFDFGTYLRALSSGIVS--ESFVAKYFFCLWWGLQNLSTLGGLETSTYVGEVIFSTALAIAGLLFALLIGNMCKYLCSTTI-----RLEEMRVKRRD : 455  
 BoCNGC7 : DG-YDVWNKTKESVLQKSCRAELDD-P---NPFDFGTYLRALSSGIVS--QKFITIKYCYCLWWGLQNLSTLGGLETSTYVGEVIFSTALAIAGLLFALLIGNMCKYLCSTTI-----RLEEMRVKRRD : 438  
 BoCNGC8 : SSRETEWIKTVPELLKSNCSAKADD-----AKFNKYGYGQALSSGIVS--TTFFSKYFCMLWWGLQNLSTLGGLETSTYVGEVIFSTALAIAGLLFALLIGNMCKYLCSTTV-----RLEEMRVKRRD : 438  
 BoCNGC11 : RPDNRNWNQNTV--VFSNCDPSND-----IRFTFGIFADALTRNVVS--P-FLEKYLMLWFLGQLSSYGNLDTSTVLETFMFAITVAIAGLLFALLIGNMCKYLCSTIV-----RLEEMRVKRRD : 419  
 BoCNGC12 : REDRNNWQNVTV--VFSNCDPSNK-----IRFTFGIFADALTRNVVS--P-FLEKYLMLWFLGQLSSYGNLDTSTVLETFMFAITVAIAGLLFALLIGNMCKYLCSTIV-----RLEEMRVKRRD : 423  
 BoCNGC10 : DARQQQWANVTN--VFRLCDAR-K-----GDFKYGMEFENAITKKVVS--N-FNERKYFCMLWWGLQNLSSYGNLSTTTFIGETTFEAVLTAIAGLLFALLIGNMCKYLCSTIV-----RLEEMRVKRRD : 422  
 BoCNGC13 : QPERQYQWNTVQ--VLSHCDATSS-----TTNFKFGMFAFAFTTQVATI--D-FVSN-----SYGNITTSVYLGETTFCTITICIGLILFLLIGNMCKYLCSTMSV-----RVEEMRVKRRD : 373  
 BoCNGC14 : DPGRQAWMRITR--VLSNCDARNDD-----DQFQFGMFGDFTNDVTSS--P-FFDKYFCMLWWGLRNLSYGGQLAATLSLSTFSCFCVAGLVFESHIGNVQNYLCSTIA-----RLEEMRVKRRD : 395  
 BoCNGC9 : DPQRNSWFESWN--ITTICKPGTR-----EYFEGYIGDAVSTVTS--N-FINRYFCMLWWGLKNSLGLQNLSTYVGEIIFAVVMATIGLVLFALLIGNMCKYLCSTTM-----RLEEMRVKRRD : 415  
 BoCNGC18 : TE---VLHAWKINVSANACFQEDG-----FDYGYTLKAVNLTSNCR--WYRYSYSLFWCFQCIISTLAGNQVFSYFFGEVFTMCIIGLGLFALLIGNMCKYLCSTLGR-----RDEEMRVKRRD : 483  
 BoCNGC19 : TV---TQAVLNWNVTAACAFQENG-----FRYGYLWRAVNLTHTDN--LPERYIYSLFWCFQCIISTLAGNQVFSYFFGEVFTMCIIGLGLFALLIGNMCKYLCSTLGR-----RNMEMRLRRD : 367  
 BoCNGC20 : SA---LSAAWKDNAGASACFQEDG-----FFYGYTLKAVNLTNHS--LFTRYYSYSLFWCFQCIISTLAGNLFYSYFLGEVFTMCIIGLGLLFFALLIGNMCKYLCSTLGR-----RNMEMRLRRD : 520  
 BoCNGC21 : SE---AFAAWKGNASASACFQDGG-----FFYGYLWRAVNLTSHS--LFTRYYSYSLFWCFQCIISTLAGNLFYSYFLGEVFTMCIIGLGLLFFALLIGNMCKYLCSTLGR-----RNMEMRLRRD : 526  
 BoCNGC22 : ----HVAAWKDNASAIACFQEDG-----FFYGYTLKAVNLTNHS--LFTRYYSYSLFWCFQCIISTLAGNLFYSYFLGEVFTMCIIGLGLLFFALLIGNMCKYLCSTLGR-----RNMEMRLRRD : 509  
 BoCNGC23 : NISASLRATWRNSASANACFQEDG-----FSYGYLWRAVNLTHTS--LLTRYYSYSLFWCFQCIISTLAGNLFYSYFFGEVFTMCIIGLGLLFFALLIGNMCKYLCSTLGR-----RNMEMRLRRD : 550  
 BoCNGC25 : YARESQIALWRESVSNACFQEGG-----FSFGTYLWRAVNLTQPN--IFTFRYSYSLFWCFQCIISTLAGNQVFSYFFGEVFTMCIIGLGLLFFALLIGNMCKYLCSTLGR-----RNMEMRLRRD : 526  
 BoCNGC26 : NLR---ALWRDSEVSNACFQESG-----FSFGTYLWRAVNLTQPN--IFTFRYSYSLFWCFQCIISTLAGNQVFSYFFGEVFTMCIIGLGLLFFALLIGNMCKYLCSTLGR-----RNMEMRLRRD : 512  
 BoCNGC24 : YASASLRALWRDSDSVNACFQESG-----FSYGYLWRAVNLTSHS--LFTFRYSYSLFWCFQCIISTLAGNLFYSYVGEVFTMCIIGLGLLFFALLIGNMCKYLCSTLGR-----RNMEMRLRRD : 510

5 5G 5 a g s 3 e F 6 GL 1f LIGN6q L 4 e r

BoCNGC15 : IEWWMKRRLEFLFCRQVRNRYERQRWAAMRGVDECEMVQNLLEGLRRDIYHLCLDLDVQVPLFQHMD-IVLENICDRVKSILFTKGETIQKEGDAVQRMLFVVRGHLQSSQL--LRDGVKSCCMLGPFNFSDELLSWCRRPFVERLP : 582  
 BoCNGC16 : IEWWMKRRLEFLFCRQVRNRYERQRWAAMRGVDECEMVQNLLEGLRRDIYHLCLDLDVQVPLFQHMD-IVLENICDRVKSILFTKGETIQKEGDAVQRMLFVVRGHLQSSQL--LRDGVKSCCMLGPFNFSDELLSWCRRPFVERLP : 585  
 BoCNGC17 : MEWWMKRRLEFLFCRQVRNRYERQRWAALGGEDELELHLDLPGLRDRIKYLQVLDLQVPLFQHMD-IVLENICDRVKSILFTKGETIQKEGDAVQRMLFVVRGHLQSSQL--LSKGVVATSTLEPGYLDDELLSWCRRPFIDRLP : 609  
 BoCNGC2 : AEQWMHHRMLPEPDLRKRIRRYEQYRWLETRGVDEEENLVSNLEKCLRRDIKRRHCLALVRRVPLEFNME-RLDDAICERIKPCLYTEKSEFLVREGDFVNBMLFIIRGRLESVITDGGRSGFYNRSLIKEGDFCGEELLTWAIDPKSGSNLP : 590  
 BoCNGC3 : TEQWMHHRMLPEPDLRKRIRRYEQYRWLETRGVDEEENLVSNLEKCLRRDIKRRHCLALVRRVPLEFNME-RLDDAICERIKPCLYTEKSEFLVREGDFVNBMLFIIRGRLESVITDGGRSGFYNRSLIKEGDFCGEELLTWAIDPKSGSNLP : 590  
 BoCNGC1 : AEQWMHHRMLPEPDLRKRIRRYEQYRWLETRGVDEEENLVSNLEKCLRRDIKRRHCLALVRRVPLEFNME-RLDDAICERIKPCLYTEKSEFLVREGDFVNBMLFIIRGRLESVITDGGRSGFYNRSLIKEGDFCGEELLTWAIDPKSGSNLP : 590  
 BoCNGC4 : SEQWMHHRMLPEPDLRKRIRRYEQYRWLETRGVDEEENLVSNLEKCLRRDIKRRHCLALVRRVPLEFNME-RLDDAICERIKPCLYTEKSEFLVREGDFVNBMLFIIRGRLESVITDGGRSGFYNRSLIKEGDFCGEELLTWAIDPKSGSNLP : 600  
 BoCNGC5 : SEQWMHHRMLPEPDLRKRIRRYEQYRWLETRGVDEEENLVSNLEKCLRRDIKRRHCLALVRRVPLEFNME-RLDDAICERIKPCLYTEKSEFLVREGDFVNBMLFIIRGRLESVITDGGRSGFYNRSLIKEGDFCGEELLTWAIDPKSGSNLP : 600  
 BoCNGC6 : SEQWMHHRMLPEPDLRKRIRRYEQYRWLETRGVDEEENLVSNLEKCLRRDIKRRHCLALVRRVPLEFNME-RLDDAICERIKPCLYTEKSEFLVREGDFVNBMLFIIRGRLESVITDGGRSGFYNRSLIKEGDFCGEELLTWAIDPKSGSNLP : 605  
 BoCNGC7 : VEQWMHHRMLPEPDLRKRIRRYEQYRWLETRGVDEEENLVSNLEKCLRRDIKRRHCLALVRRVPLEFNME-RLDDAICERIKPCLYTEKSEFLVREGDFVNBMLFIIRGRLESVITDGGRSGFYNRSLIKEGDFCGEELLTWAIDPKSGSNLP : 588  
 BoCNGC8 : SEQWMHHRMLPEPDLRKRIRRYEQYRWLETRGVDEEENLVSNLEKCLRRDIKRRHCLALVRRVPLEFNME-RLDDAICERIKPCLYTEKSEFLVREGDFVNBMLFIIRGRLESVITDGGRSGFYNRSLIKEGDFCGEELLTWAIDPKSGSNLP : 588  
 BoCNGC11 : TEQWMHHRMLPEPDLRKRIRRYEQYRWLETRGVDEEENLVSNLEKCLRRDIKRRHCLALVRRVPLEFNME-RLDDAICERIKPCLYTEKSEFLVREGDFVNBMLFIIRGRLESVITDGGRSGFYNRSLIKEGDFCGEELLTWAIDPKSGSNLP : 569  
 BoCNGC12 : TEQWMHHRMLPEPDLRKRIRRYEQYRWLETRGVDEEENLVSNLEKCLRRDIKRRHCLALVRRVPLEFNME-RLDDAICERIKPCLYTEKSEFLVREGDFVNBMLFIIRGRLESVITDGGRSGFYNRSLIKEGDFCGEELLTWAIDPKSGSNLP : 573  
 BoCNGC10 : TEQWMHHRMLPEPDLRKRIRRYEQYRWLETRGVDEEENLVSNLEKCLRRDIKRRHCLALVRRVPLEFNME-RLDDAICERIKPCLYTEKSEFLVREGDFVNBMLFIIRGRLESVITDGGRSGFYNRSLIKEGDFCGEELLTWAIDPKSGSNLP : 572  
 BoCNGC13 : TEQWMHHRMLPEPDLRKRIRRYEQYRWLETRGVDEEENLVSNLEKCLRRDIKRRHCLALVRRVPLEFNME-RLDDAICERIKPCLYTEKSEFLVREGDFVNBMLFIIRGRLESVITDGGRSGFYNRSLIKEGDFCGEELLTWAIDPKSGSNLP : 523  
 BoCNGC14 : TEQWMHHRMLPEPDLRKRIRRYEQYRWLETRGVDEEENLVSNLEKCLRRDIKRRHCLALVRRVPLEFNME-RLDDAICERIKPCLYTEKSEFLVREGDFVNBMLFIIRGRLESVITDGGRSGFYNRSLIKEGDFCGEELLTWAIDPKSGSNLP : 545  
 BoCNGC9 : TEQWMHHRMLPEPDLRKRIRRYEQYRWLETRGVDEEENLVSNLEKCLRRDIKRRHCLALVRRVPLEFNME-RLDDAICERIKPCLYTEKSEFLVREGDFVNBMLFIIRGRLESVITDGGRSGFYNRSLIKEGDFCGEELLTWAIDPKSGSNLP : 565  
 BoCNGC18 : VEQWMHHRMLPEPDLRKRIRRYEQYRWLETRGVDEEENLVSNLEKCLRRDIKRRHCLALVRRVPLEFNME-RLDDAICERIKPCLYTEKSEFLVREGDFVNBMLFIIRGRLESVITDGGRSGFYNRSLIKEGDFCGEELLTWAIDPKSGSNLP : 626  
 BoCNGC19 : VNKWMHHRMLPEPDLRKRIRRYEQYRWLETRGVDEEENLVSNLEKCLRRDIKRRHCLALVRRVPLEFNME-RLDDAICERIKPCLYTEKSEFLVREGDFVNBMLFIIRGRLESVITDGGRSGFYNRSLIKEGDFCGEELLTWAIDPKSGSNLP : 510  
 BoCNGC20 : VEQWMHHRMLPEPDLRKRIRRYEQYRWLETRGVDEEENLVSNLEKCLRRDIKRRHCLALVRRVPLEFNME-RLDDAICERIKPCLYTEKSEFLVREGDFVNBMLFIIRGRLESVITDGGRSGFYNRSLIKEGDFCGEELLTWAIDPKSGSNLP : 663  
 BoCNGC21 : VEQWMHHRMLPEPDLRKRIRRYEQYRWLETRGVDEEENLVSNLEKCLRRDIKRRHCLALVRRVPLEFNME-RLDDAICERIKPCLYTEKSEFLVREGDFVNBMLFIIRGRLESVITDGGRSGFYNRSLIKEGDFCGEELLTWAIDPKSGSNLP : 669  
 BoCNGC22 : ---HRRFLEKIRKSVRREAEERFNWAAATRGVNEELLFENMEDDLDQDIRRHFI-FLKKVRFSLMDE-SILDAIRERIKPCLYTEKSEFLVREGDFVNBMLFIIRGRLESVITDGGRSGFYNRSLIKEGDFCGEELLTWAIDPKSGSNLP : 646  
 BoCNGC23 : VEQWMHHRMLPEPDLRKRIRRYEQYRWLETRGVDEEENLVSNLEKCLRRDIKRRHCLALVRRVPLEFNME-RLDDAICERIKPCLYTEKSEFLVREGDFVNBMLFIIRGRLESVITDGGRSGFYNRSLIKEGDFCGEELLTWAIDPKSGSNLP : 693  
 BoCNGC25 : VEQWMHHRMLPEPDLRKRIRRYEQYRWLETRGVDEEENLVSNLEKCLRRDIKRRHCLALVRRVPLEFNME-RLDDAICERIKPCLYTEKSEFLVREGDFVNBMLFIIRGRLESVITDGGRSGFYNRSLIKEGDFCGEELLTWAIDPKSGSNLP : 669  
 BoCNGC26 : VEQWMHHRMLPEPDLRKRIRRYEQYRWLETRGVDEEENLVSNLEKCLRRDIKRRHCLALVRRVPLEFNME-RLDDAICERIKPCLYTEKSEFLVREGDFVNBMLFIIRGRLESVITDGGRSGFYNRSLIKEGDFCGEELLTWAIDPKSGSNLP : 655  
 BoCNGC24 : VEQWMHHRMLPEPDLRKRIRRYEQYRWLETRGVDEEENLVSNLEKCLRRDIKRRHCLALVRRVPLEFNME-RLDDAICERIKPCLYTEKSEFLVREGDFVNBMLFIIRGRLESVITDGGRSGFYNRSLIKEGDFCGEELLTWAIDPKSGSNLP : 653

e wm h4 lp r6R W t G Ee 6 6p d6 di rh1 6 V f 6d 66da6 g 6 66f6 4G 6 s g 6 g cG eLL W 1

```

760          *          780          *          800          *          820          *          840          *          860          *          880          *          900
BoCNGC15 : P-----SSSTVILETTEAEGLDAAQDVKVVYVQHFERYTFVNEKVKRSARYYSPGNRTWAAVAQCLAWRRYKHFLLTSL-----SFIRPRRPLSRCASLGEDK--- : 674
BoCNGC16 : P-----STSTVILETTEAEGLDAAQDVKVVYVQHFERYTFVNEKVKRSARYYSSGNRTWAAVAQCLAWRRYKHFLLTSL-----SFIRPRRPLSRCASLGEDK--- : 677
BoCNGC17 : P-----SSATFVCLDSTEEAFLGSEDLRYITDFERYKFANERLKRRTARYSSNWRWAAVNIQMSNRRYKRTCVG-----GSMSPVSEHS-VEGNSERR--- : 698
BoCNGC2 : I-----STSTVQAQTEVEGFVLSADDLKEVATQYRRINS-KQLRHMFVHESVQNRRTWAACFIQAANKRYCRKLSRALREEEERLENTLQTTDS-----GGNKLNLGAAIYASRFASHALRNVRA : 673
BoCNGC3 : T-----SRSVLTLLTVEGSIILLHDDLKVFASHENRSHS-SRLRHMFREYSANRLWAACFIQAANREHCRKLSRILHAKRD--YHHPQ-----GPQNLGAAIYVSRFVSKALRNQRK : 622
BoCNGC1 : I-----SRTVQALTEVEAFALAAEDLKVAVASQERRLHS-KQLQHTFRFYSVQNRRTWAACFIQAANRRHCRRLARSLTQEEDQFRIAVAKRERR-----AASSSLVATLYASRFASNALRNLR- : 682
BoCNGC4 : S-----SRTVRALTEVEAFALIADDELKVFASQERRLHS-RQVQHTFRFYSQQNRRTWAACFIQAANRRYKRRKLEELRKEEM-----EESSAARLIAGGSSPYSIRATFLASRFAANALRGVRK : 706
BoCNGC5 : S-----SRTVRALTEVEAFALIADDELKVFASQERRLHS-RQVQHTFRFYSQQNRRTWAACFIQAANRRYKRRKLEELRKEEM-----EEE-TAARLIAGGS-PYSIRATFLASKFAANALRSVHK : 714
BoCNGC6 : S-----SRTVARALTEVEAFALIADDELKVFASQERRLHS-RQVQHTFRFYSQQNRRTWAACFIQAANRRYKRRKLEELRKEEM-----EGEGPVASIRATFLASKFAANALRKVHQ : 714
BoCNGC7 : S-----SRTVRALTEVEAFALASEELKVFASQERRLHS-RQVQHTFRFYSHQNRRTWAACFIQAANRRYKRRKMEEAEEAEAVP-----MST-----TGSS--SSMGAAFVTKFAASALRTIHR : 695
BoCNGC8 : S-----SRTVRALTEVEAFALAEDELKVFASQERRLHS-RQVQHTFRFYSQQNRRTWAACFIQAANRRHRRKNAELRRIEEEEDEMGYEDEYDD-----DDAEEDERTPVFTRTESSRLRSTIFASRFAANALKG-HR : 717
BoCNGC11 : S-----SRTVRALTEVEAFALQADDLKVFANQERRLHS-KKLQHTFRFYSHQNRRTWAACFIQAVANRRYKRRMVAKLSLAESFSSYEEEEAVA---VAEEIMSQQGERQSSNPSRHSTSIGKPHFAATILASRFKNTRK---- : 702
BoCNGC12 : S-----SRTVRALTEVEAFALQADDLKVFANQERRLHS-KKLQHTFRFYSHQNRRTWAACFIQAVANRRYKRRMLAKLSLAESYSSYEEELAT---AAEEIMSQQEERQSSTPSRHHTSIEKPHFAATVLAASRFKNTRR---- : 707
BoCNGC10 : S-----SRTVRALTEVEAFALRADDLKVFANQERRLHS-KKLQHTFRFYSHQNRRTWAACFIQAANRRYKRRAMENHLTAVESKQSDDEEEEEEV---VVGKVVVEEEEGVGFSPN-----TKMNIQVMVLASRFAANTRRGV-- : 700
BoCNGC13 : S-----SRSVRLSEVEAFALSADDLKVFVAHQEKRLQS-KKLQHAFRYSHQNRWAGCAEFCVSAWRRYKRRKLAKELSLHESGGYRDETGYNEEGDEENYVGSDDDFEGERLSVDNTNNSQNLGATMLASKFAANTRRGTNQ : 663
BoCNGC14 : L-----SRTVRLTSEVEAFALRADDLKVFANQERRLHS-KKLQHAFRYSHQNRWAGTGFQAVANRRYKRRKLAMELARQEEGDDYYDD-----DDDDQYGGED-MPESSNNVDDNNSNNQNLSATILASKFAANTRRGVLG : 677
BoCNGC9 : S-----SRTVRAIYVEAFALRADDLKEVATQERRLHS-KQLKHKFRFYSHQNRRTWAACFIQAANRRHRRKRYATELRVKEEFQCMFETAS-----MVRNLNSGKFTR----- : 662
BoCNGC18 : TMIRMPKGLLSSRDVWCVTNVEAFSLSVADLLEDVTSLEFNLIEIPREP----- : 674
BoCNGC19 : TMIRMPKGLLSSRAVWCVTNVEAFSLSVADLLEDVTSLEFNLIEIPREP----- : 558
BoCNGC20 : TRIRMPKGLLSSRNRCVTNVEAFSLSVADLLEDVTSLEFRLRNSRVQGAIRYVSPYWRRLRAAMCIQVAVRYYRRLRQLRYTDQS-SYSL----- : 753
BoCNGC21 : TRIRIPKGLLSSRNRCVTNVEAFSLSVADLLEDVTSLEFRLRNSRVQGAIRYVSPYWRRLRAARCIQVAVRYYRRLRQLRYTAQS-SYSL----- : 759
BoCNGC22 : TRIRMPKGLVSNRNRCVTNVEAFSLSVADLLEDVTSLEFLRTHRECGAIR--SPHWRRLRAARCIQVAVRYYRRLRQLRYTAQS-SYSL----- : 734
BoCNGC23 : ---RMLSKGLLSSRNRCVTNVEAFSLSADLLEDVTSLE--FLRSHRVQGAIRYVSPYWRRLRAATCIQVAVRYYRRLRQLRKLSTAKKQYSLELIKDMAKT----- : 789
BoCNGC25 : TRIKMPKGLVSNRNRCVTNVEAFSLSVADLLEDVTSLEFRLRNSRVQGAIRYVSPYWRRLRAAMCIQVAVRYYRRLRQLRLLQDNRMKMSDVPVIGYRLSWSGVVEGSGK----- : 781
BoCNGC26 : TRIKMPKGLVSNRNRCVTNVEAFSLSVADLLEDVTSLEFRLRNSRVQGAIRYVSPYWRRLRAAMCIQVAVRYYRRLRQLRLLQDNRMKMSDVPVIGYRLSWSGVVEGSGK----- : 744
BoCNGC24 : RSIKLPKGLVSNRNRCVTNVEAFSLSVADLLEDVTSLEFRLRNSRVQGAIRYVSPYWRRLRAATCIQVAVRYYRRLRQLRLLQDNRMKMSDVPVIGYRLSWSGVVEGSGK----- : 743

```

```

*          920          *          940
BoCNGC15 : -----LRLYTAILTSPKENPDDDDY---- : 695
BoCNGC16 : -----LRLYTAILTSPKENPDDDDY---- : 698
BoCNGC17 : -----LLQYAAMFMSIREH-DHLE----- : 716
BoCNGC2 : NAAAR-----NSMLPHMLSLLPQKPADPEFPMDET-- : 703
BoCNGC3 : NAAN-----CSISPHMLPPIPHKPADPEFSKN---- : 649
BoCNGC1 : -----QHNTLPLLPKPEPEDFGVDDD-- : 704
BoCNGC4 : NRTAKL----LALSQPTKELLKVQKPEPEPDESADC--- : 737
BoCNGC5 : NRIRKS----NLAPPSTKELVKVQKPEPEPDESADC--- : 745
BoCNGC6 : NRIA-----AKSTKELVIFQKRESEPEPDESADDP-- : 741
BoCNGC7 : NRNTR-----IRELVKLQKPEPEPDEFTAEDAD-- : 721
BoCNGC8 : LRSTE-----SSKRLNLQKPEPEPDEFAE---- : 741
BoCNGC11 : -----TAHKLKDVEVPMLEKPEPEPDESVDGD-- : 728
BoCNGC12 : -----ASRKIKDVDVEMLEKPEPEPDESVDAD-- : 733
BoCNGC10 : -----AAQRVKDVEVEMERFKKPEPEPDESPEPDD-- : 727
BoCNGC13 : KASSSSSTGKKDGSNSLKMPLKPEPEPDESMDKEDV : 701
BoCNGC14 : NQRGSS---RIDPDDPTLKMFKMFKPEPDEGFF----- : 706
BoCNGC9 : -----SGSDSGMVSSIQKPEPEPDESSE---- : 684
BoCNGC18 : ----- : -
BoCNGC19 : ----- : -
BoCNGC20 : ----- : -
BoCNGC21 : ----- : -
BoCNGC22 : ----- : -
BoCNGC23 : ----- : -
BoCNGC25 : ----- : -
BoCNGC26 : ----- : -
BoCNGC24 : ----- : -

```
