# Supplementary material for: Comprehensive genomic analysis of the CNGC gene family in Brassica oleracea: novel insights into synteny, structures, and transcript profiles
Source: PubMed Central journal article supplement (PMC5683364; doi:10.1186/s12864-017-4244-y), 2017-11-13

PLANT-PATHOGEN INTERACTION

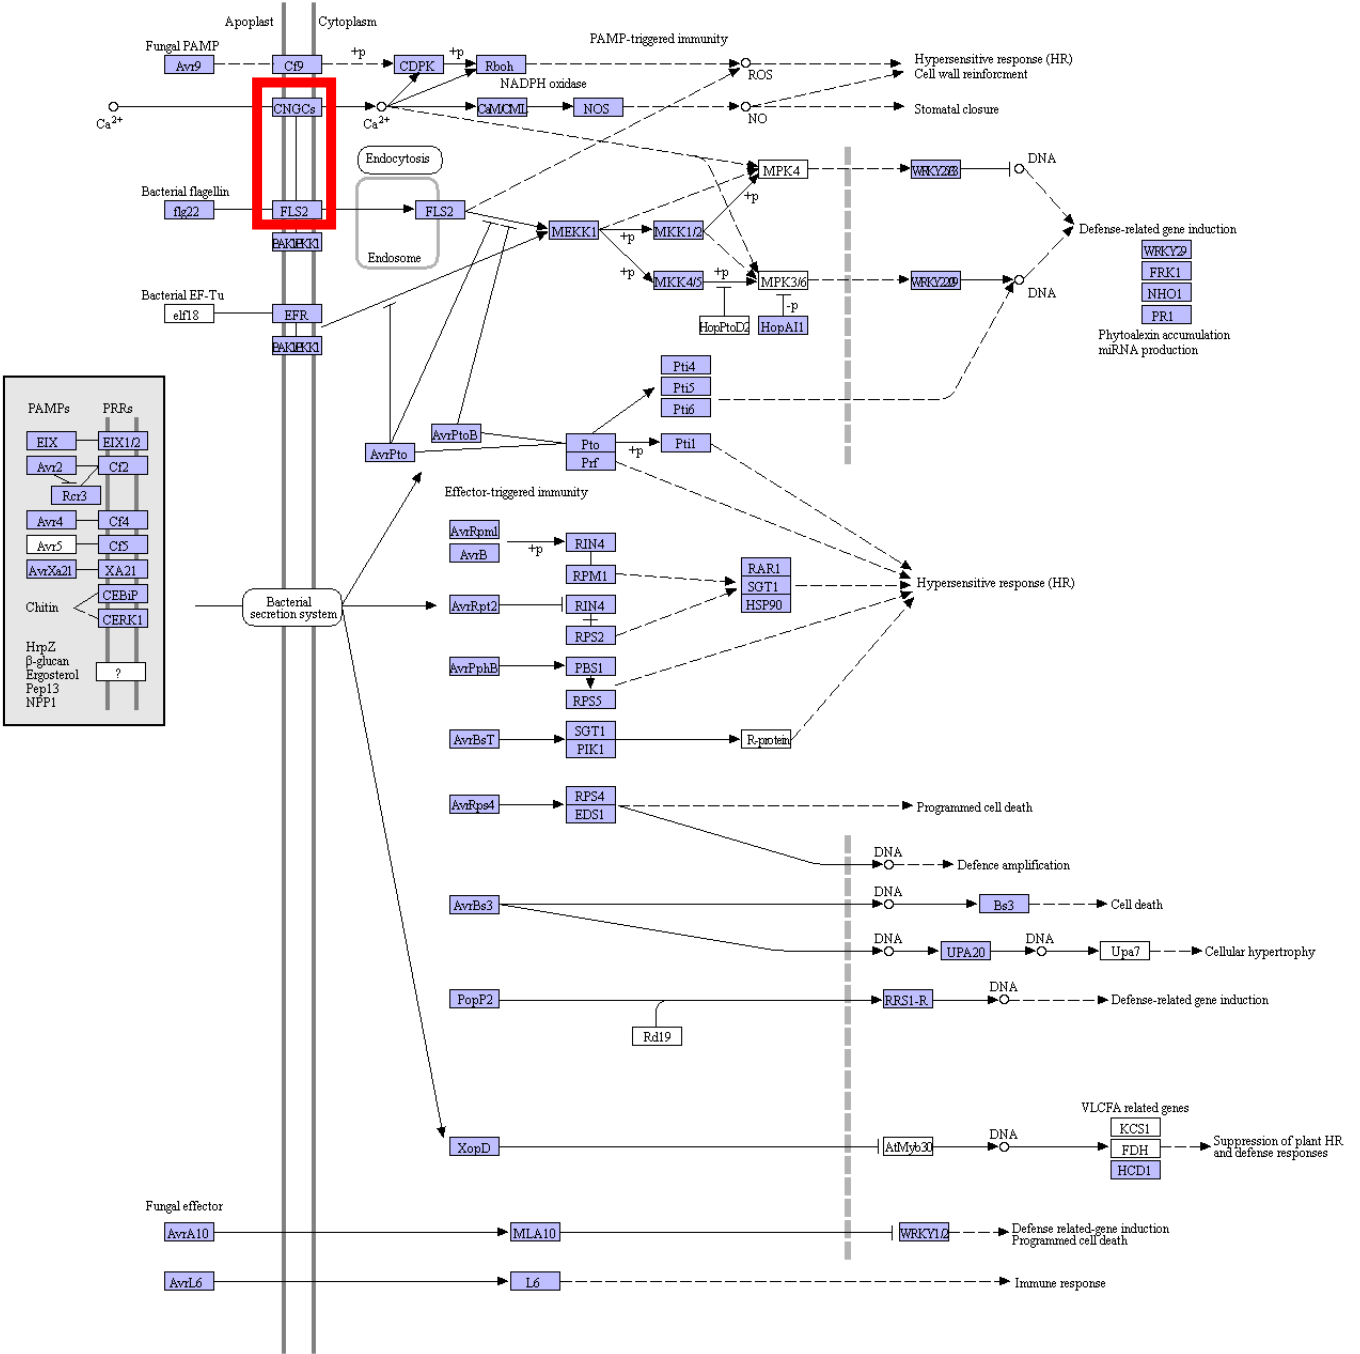

Supplement: 12864_2017_4244_MOESM14_ESM.pdf [file 12864_2017_4244_MOESM14_ESM.pdf]
