# Supplementary material for: Comprehensive genomic analysis of the CNGC gene family in Brassica oleracea: novel insights into synteny, structures, and transcript profiles
Source: PubMed Central journal article supplement (PMC5683364; doi:10.1186/s12864-017-4244-y), 2017-11-13
Supplement: 12864_2017_4244_MOESM21_ESM.pdf [file 12864_2017_4244_MOESM21_ESM.pdf]

### Wild type

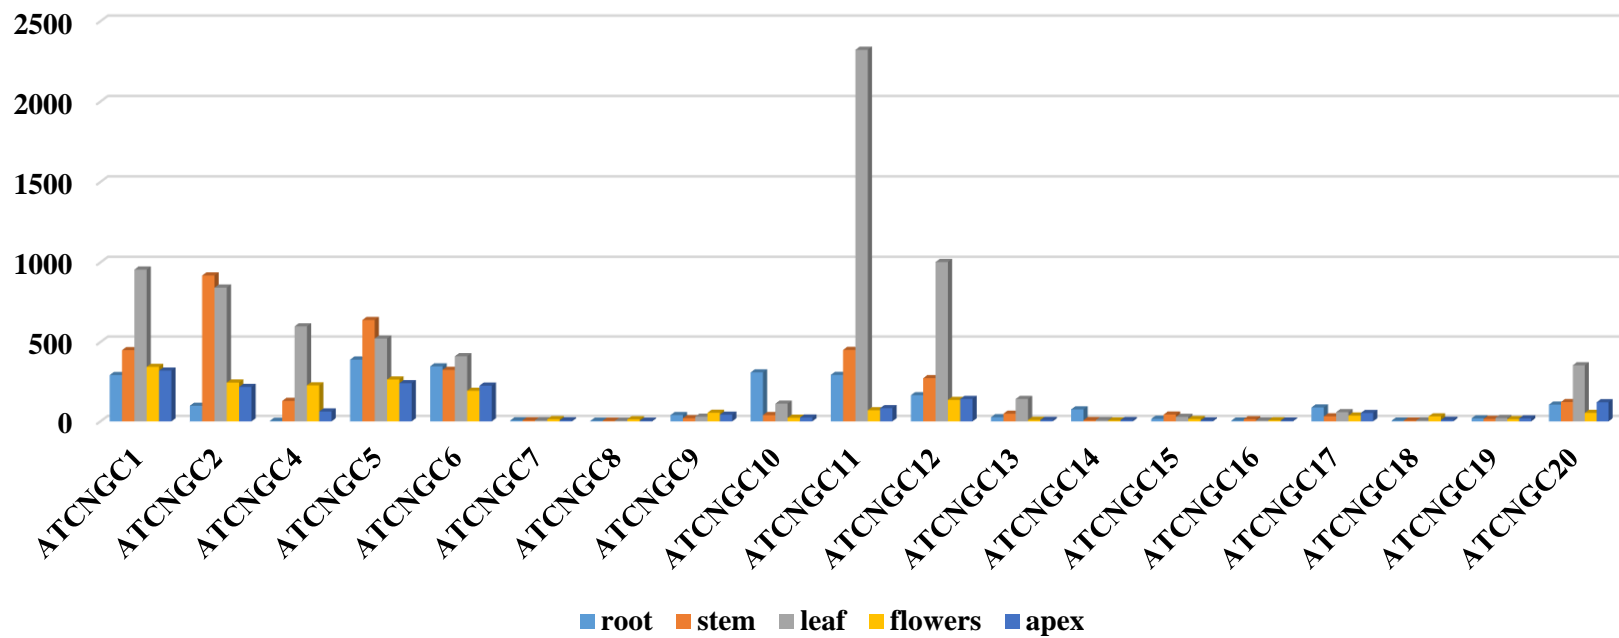

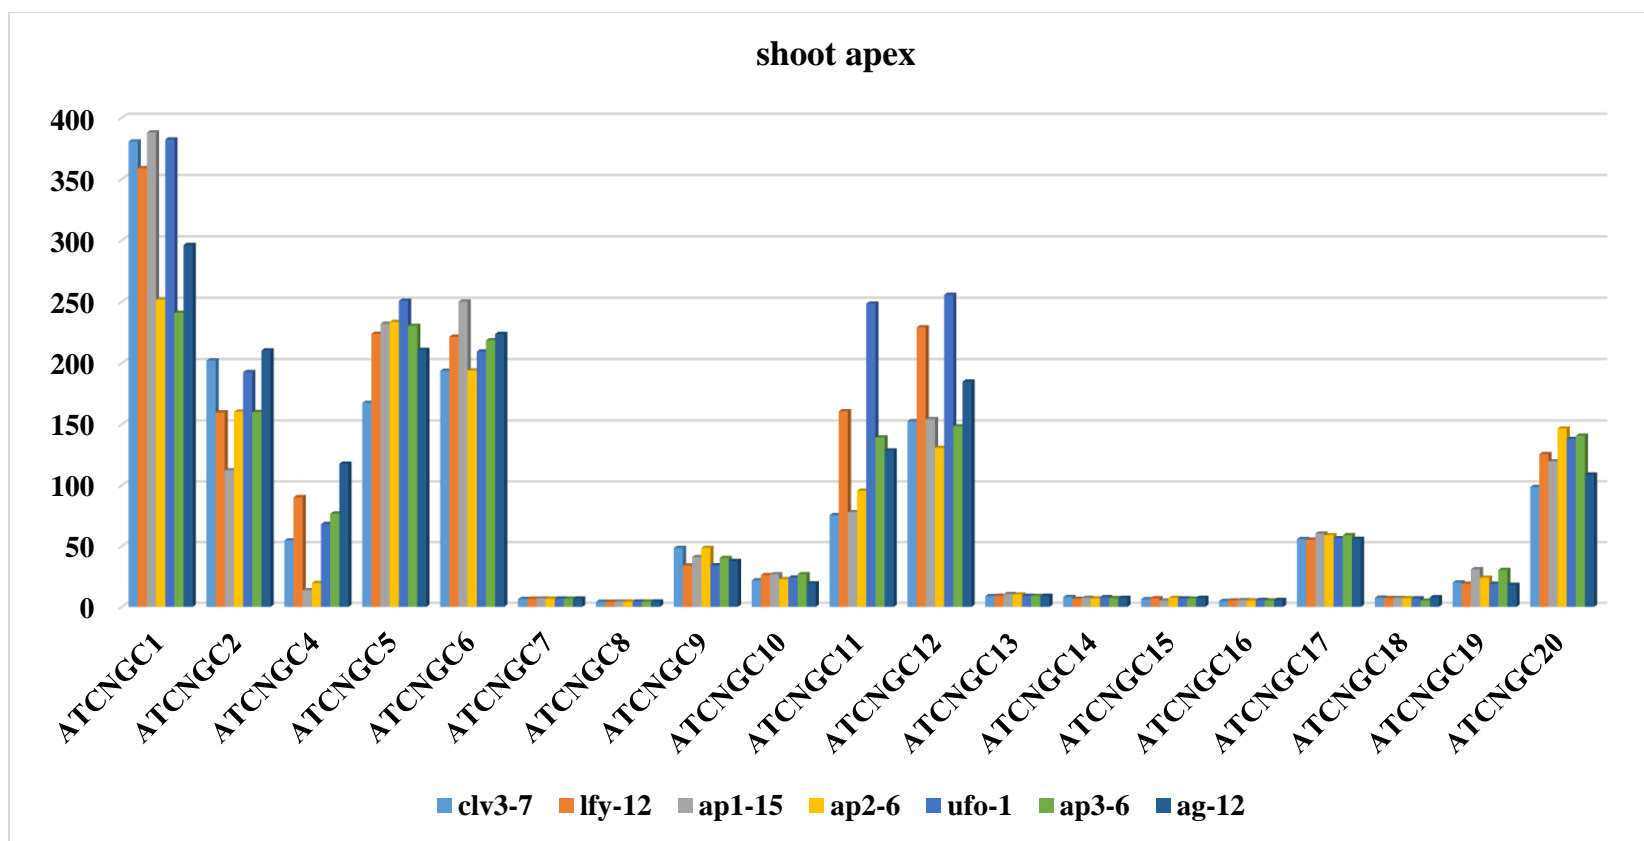

| <b>Genotype</b> | <b>Genotype Tissue</b>                    | <b>Age</b> | <b>Photoperiod</b> | <b>Substrate</b> |
|-----------------|-------------------------------------------|------------|--------------------|------------------|
| <i>clv3-7</i>   | shoot apex, inflorescence (after bolting) | 21+ days   | continuous light   | soil             |
| <i>lfy-12</i>   | shoot apex, inflorescence (after bolting) | 21+ days   | continuous light   | soil             |
| <i>ap1-15</i>   | shoot apex, inflorescence (after bolting) | 21+ days   | continuous light   | soil             |
| <i>ap2-6</i>    | shoot apex, inflorescence (after bolting) | 21+ days   | continuous light   | soil             |
| <i>ap3-6</i>    | shoot apex, inflorescence (after bolting) | 21+ days   | continuous light   | soil             |
| <i>ag-12</i>    | shoot apex, inflorescence (after bolting) | 21+ days   | continuous light   | soil             |
| <i>ufo-1</i>    | shoot apex, inflorescence (after bolting) | 21+ days   | continuous light   | soil             |

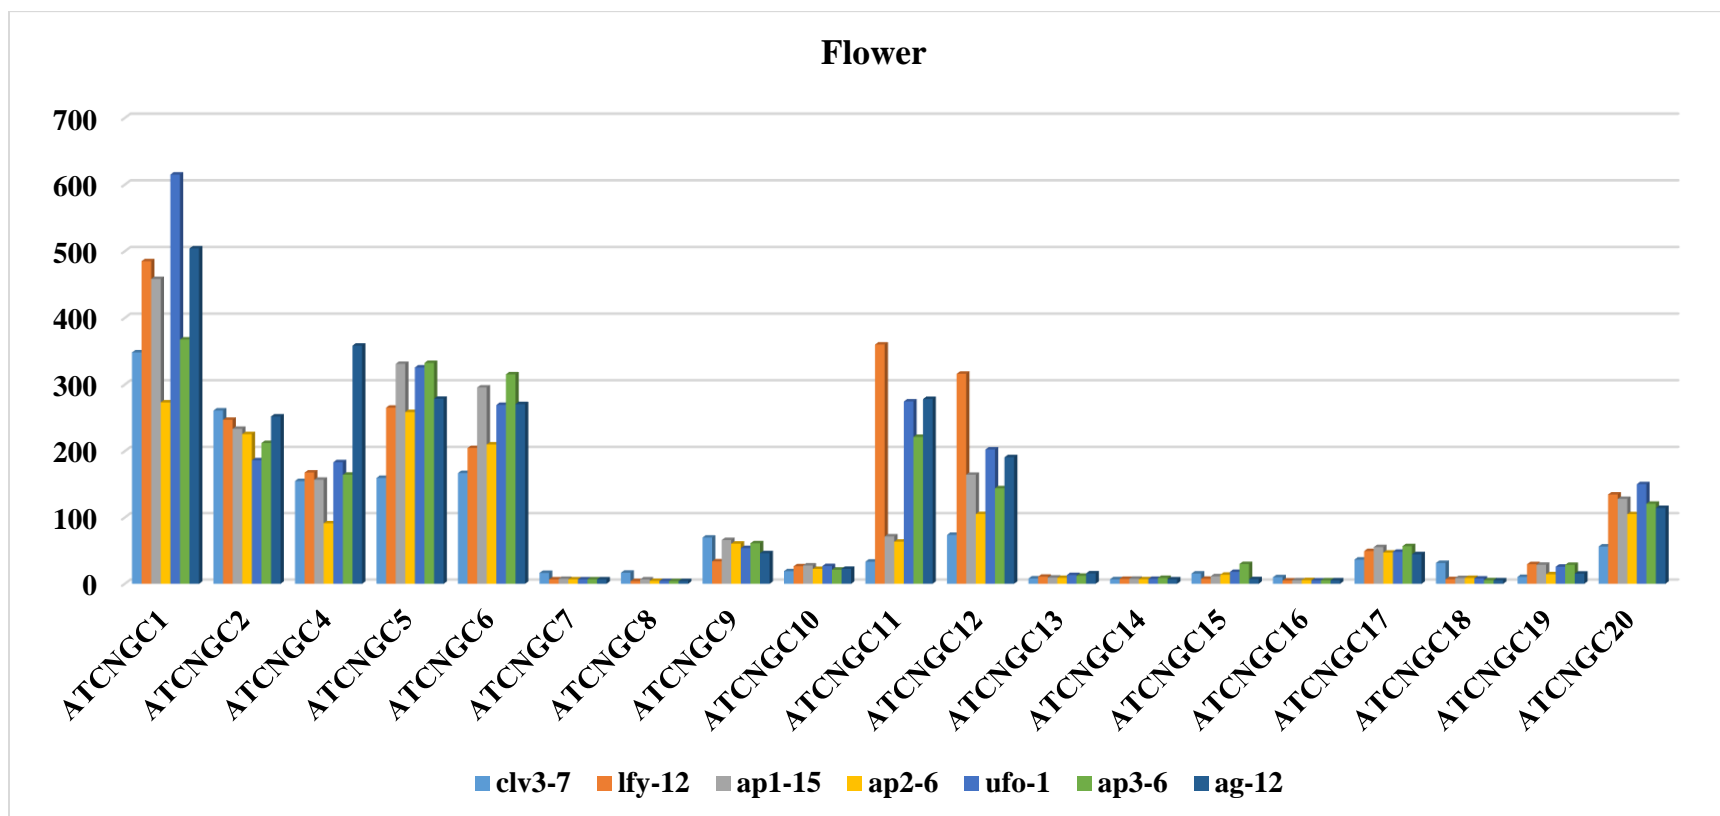

| Genotype      | Tissue                                                                                  | Age      | Photoperiod      | Substrate |
|---------------|-----------------------------------------------------------------------------------------|----------|------------------|-----------|
| <i>clv3-7</i> | flower stage 12; multi-carpel gynoecium; enlarged meristem; increased organ number      | 21+ days | continuous light | soil      |
| <i>lfy-12</i> | flower stage 12; shoot characteristics; most organs leaf-like                           | 21+ days | continuous light | soil      |
| <i>ap1-15</i> | flower stage 12; sepals replaced by leaf-like organs, petals mostly lacking, 2° flowers | 21+ days | continuous light | soil      |
| <i>ap2-6</i>  | flower stage 12; no sepals or petals                                                    | 21+ days | continuous light | soil      |
| <i>ap3-6</i>  | flower stage 12; no petals or stamens                                                   | 21+ days | continuous light | soil      |
| <i>ag-12</i>  | flower stage 12; no stamens or carpels                                                  | 21+ days | continuous light | soil      |

*ufo-1*

flower stage 12; filamentous organs in whorls two and three

21+ days

continuous light

soil

---
